# Supplementary material for: Stability of cytokine, cellular and clinical response to the intravenous LPS challenge repeated after one year: a healthy volunteer trial
Source: Springer Nature journal article supplement (doi:10.1007/s00430-025-00823-5), 2025-03-06
Supplement: MOESM1 [file 430_2025_823_MOESM1_ESM.pdf]

## **Supplementary Appendix to:**

**Stability of cytokine, cellular and clinical response to the intravenous LPS challenge repeated after one year: a healthy volunteer trial**

# Tables

**Supplementary Table 1** Inclusion and exclusion criteria

| Inclusion criteria                                                                                                                                                                                                                                                                                                                                                                                                                                                                                                                                                                                                                                                                                                                                                                                                                                                                                                                                                                                                                                                                                                                                                                                                                                                                                                                                                                              |
|-------------------------------------------------------------------------------------------------------------------------------------------------------------------------------------------------------------------------------------------------------------------------------------------------------------------------------------------------------------------------------------------------------------------------------------------------------------------------------------------------------------------------------------------------------------------------------------------------------------------------------------------------------------------------------------------------------------------------------------------------------------------------------------------------------------------------------------------------------------------------------------------------------------------------------------------------------------------------------------------------------------------------------------------------------------------------------------------------------------------------------------------------------------------------------------------------------------------------------------------------------------------------------------------------------------------------------------------------------------------------------------------------|
| <ul style="list-style-type: none"><li>• Written informed consent was given by volunteers after being provided detailed information about the nature, risks, and scope of the study.</li><li>• Healthy according to the medical history, ECG, vital signs, laboratory results, and physical examination</li><li>• Male and female participants</li><li>• Age: <math>\geq 20</math> to <math>\leq 30</math> years</li><li>• For women of childbearing age: use of effective birth control or abstinence from heterosexual intercourse with fertile men</li></ul>                                                                                                                                                                                                                                                                                                                                                                                                                                                                                                                                                                                                                                                                                                                                                                                                                                  |
| Exclusion criteria                                                                                                                                                                                                                                                                                                                                                                                                                                                                                                                                                                                                                                                                                                                                                                                                                                                                                                                                                                                                                                                                                                                                                                                                                                                                                                                                                                              |
| <ul style="list-style-type: none"><li>• Known or suspected allergy to LPS</li><li>• History of severe allergic or anaphylactic reactions to any medication</li><li>• Pregnancy or no current birth control method (woman of childbearing age)</li><li>• Blood or plasma donation within the last 4 weeks before the scheduled day of the first blood draw or anytime during the study</li><li>• Treatment with an investigational drug within three weeks before the study day</li><li>• Smoking more than 5 cigarettes per day</li><li>• History of substance abuse</li><li>• Regular use of medication other than birth control</li><li>• Use of any medication within one week before study days except birth control</li><li>• Symptoms of a clinically relevant illness in the 3 months before the study day</li><li>• Known coagulation disorder, i.e., factor V Leiden mutation.</li><li>• Liver or kidney dysfunction</li><li>• Positive serology for hepatitis or HIV</li><li>• Weight <math>&gt; 95</math> kg and <math>\leq 60</math> kg for men or <math>\leq 50</math> kg for women</li><li>• Other objections to participating in the study in the opinion of the investigator.</li><li>• Any vaccination (including but not limited to COVID-19 and Influenza vaccines) within 4 weeks before study day 1</li><li>• Previous participation in an intravenous LPS study</li></ul> |

**Supplementary Table 2** List of lifestyle restrictions before the study days

| Restrictions                                                                                                                                                                                                                                                                                                                                                                                                                                                                                                                                                                                                                               |
|--------------------------------------------------------------------------------------------------------------------------------------------------------------------------------------------------------------------------------------------------------------------------------------------------------------------------------------------------------------------------------------------------------------------------------------------------------------------------------------------------------------------------------------------------------------------------------------------------------------------------------------------|
| <ul style="list-style-type: none"><li>• Subjects will have to refrain from any medication (other than birth control) one week before study days.</li><li>• Subjects will have to refrain from alcohol, caffeine-containing beverages, or energy drinks 6 hours before study days.</li><li>• Subjects will have to ensure a sleep duration of at least 7 hours and a fasting period of at least 8 hours before study days.</li><li>• Subjects will be not allowed to receive any kind of vaccination (including but not limited to COVID-19 and Influenza vaccines) 4 weeks before the first study days until the last study day.</li></ul> |

**Supplementary Table 3** Performance of repeatedly measured quality control (QC) samples

| <b>Low Concentration</b>  | <b>IL-8 (pg/mL)</b> | <b>IL-10 (pg/mL)</b> | <b>IL-6 (pg/mL)</b> | <b>TNFa (pg/mL)</b> |
|---------------------------|---------------------|----------------------|---------------------|---------------------|
| QC_low Plate 1            | 29.1                | 702.1                | 153.4               | 141.3               |
| QC_low Plate 2            | 24.7                | 476.0                | 132.6               | 119.3               |
| QC_low Plate 3            | 25.3                | 589.1                | 130.9               | 111.0               |
| QC_low Plate 4            | 22.8                | 572.2                | 117.7               | 97.3                |
| QC_low Plate 5            | 30.9                | 586.5                | 97.5                | 122.9               |
| Standard deviation        | 3.0                 | 71.8                 | 18.4                | 14.4                |
| Mean                      | 26.6                | 585.2                | 126.4               | 118.4               |
| CoV %                     | 11.3                | 12.3                 | 14.6                | 12.2                |
| <b>High Concentration</b> | <b>IL-8 (pg/mL)</b> | <b>IL-10 (pg/mL)</b> | <b>IL-6 (pg/mL)</b> | <b>TNFa (pg/mL)</b> |
| QC_high Plate 1           | 224.3               | 5754.5               | 1215.2              | 1170.8              |
| QC_high Plate 2           | 220.5               | 5664.4               | 1075.2              | 1153.1              |
| QC_high Plate 3           | 184.3               | 5935.0               | 1029.8              | 1131.3              |
| QC_high Plate 4           | 224.8               | 5431.7               | 1203.4              | 1163.9              |
| QC_high Plate 5           | 439.1               | 8510.2               | 1439.0              | 1690.7              |
| Standard deviation        | 91.5                | 1137.1               | 142.6               | 214.8               |
| Mean                      | 258.6               | 6259.2               | 1192.5              | 1262.0              |
| CoV %                     | 35.4                | 18.2                 | 12.0                | 17.0                |

**Supplementary Table 4** Individual AUCs<sub>0-10</sub> of cytokine responses and 24-h concentration of C-reactive protein after the 1<sup>st</sup> and 2<sup>nd</sup> endotoxin challenge

| Index | Population              | Markers                                                                                   |
|-------|-------------------------|-------------------------------------------------------------------------------------------|
| 1     | Lymphocytes             | CD3 T cells + B cells + NK cells + plasma b cells                                         |
| 2     | CD3 T cells             | CD8 T cells + CD4 T cells + $\alpha$ T cells + MAIT/NKT cells                             |
| 3     | CD8 T cells             | CD3+ CD66b- CD19- CD8+ CD4- CD14- CD161- TCRgd- CD123- CD11c-                             |
| 4     | CD8 naïve               | CD8 T cells + CD45RA+ CCR7+ CD27+                                                         |
| 5     | CD8 central memory      | CD8 T cells + CD45RA- CCR7+ CD27+                                                         |
| 6     | CD8 effector memory     | CD8 T cells + CCR7- CD27+                                                                 |
| 7     | CD8 terminal effector   | CD8 T cells + CCR7- CD27-                                                                 |
| 8     | CD4 T cells             | CD66b- CD3+ CD8- CD4+ CD14- TCRgd- CD11c-                                                 |
| 9     | CD4 naïve               | CD4 T cells + CD45RA+ CCR7+ CD27+                                                         |
| 10    | CD4 central memory      | CD4 T cells + CD45RA- CCR7+ CD27+                                                         |
| 11    | CD4 effector memory     | CD4 T cells + CD45RA- CCR7- CD27+                                                         |
| 12    | CD4 terminal effector   | CD4 T cells + CD45RA- CCR7- CD27-                                                         |
| 13    | Tregs                   | CD4 T cells + CD25+ CD127- CCR4+                                                          |
| 14    | Th1-like                | CD4 T cells + CXCR3+ CCR6- CXCR5- CCR4-                                                   |
| 15    | Th2-like                | CD4 T cells + CXCR3- CCR6- CXCR5- CCR4+                                                   |
| 16    | Th17-like               | CD4 T cells + CXCR3- CCR6+ CXCR5- CCR4+                                                   |
| 17    | T cells                 | CD66b- CD3+ CD8dim,- CD4- CD14- TCRgd dim,+                                               |
| 18    | NKT cells               | CD66b- CD3+ CD4- CD14- CD161+ TCRgd- CD28+ CD16-                                          |
| 19    | B cells                 | CD3- CD14- CD56- CD16 dim,- CD19+ CD20+ HLA-DR dim,+                                      |
| 20    | B naïve                 | B cells + CD27-                                                                           |
| 21    | B memory                | B cells + CD27+                                                                           |
| 22    | Plasma b cells          | CD3- CD14- CD16-,dim CD66b- CD20- CD19+ CD56- CD38++ CD27+                                |
| 23    | NK cells                | CD14- CD3- CD123- CD66b- CD45RA+ CD56 dim,+                                               |
| 24    | NK early                | NK cells + CD57-                                                                          |
| 25    | NK late                 | NK cells + CD57+                                                                          |
| 26    | Monocytes               | CD3- CD19- CD56- CD66b- HLA-DR+ CD11c+                                                    |
| 27    | Monocytes classical     | Monocytes + CD14+ CD38+                                                                   |
| 28    | Monocytes transitional  | Monocytes + CD14 dim CD38 dim                                                             |
| 29    | Monocytes non-classical | Monocytes + CD14- CD38-                                                                   |
| 30    | DCs                     | pDCs + mDCs                                                                               |
| 31    | pDCs                    | CD3- CD19- CD14- CD20- CD66b- HLA-DR dim,+ CD11c- CD123+                                  |
| 32    | mDCs                    | CD3- CD19- CD14- CD20- HLA-DR dim,+ CD11c dim,+ CD123- CD16 dim,- CD38 dim,+ CD294- HLA-D |
| 33    | Granulocytes            | Neutrophils + basophils + eosinophils + CD66b- neutrophils                                |
| 34    | Neutrophils             | CD66b dim,+ CD16+ HLA-DR-                                                                 |
| 35    | Basophils               | HLA-DR- CD66b- CD123 dim,+ CD38+ CD294+                                                   |
| 36    | Eosinophils             | CD14- CD3- CD19- HLA-DR- CD294+ CD66b dim,+                                               |

**Supplementary Table 5** Individual AUCs<sub>0-10</sub> of cytokine responses and 24-h concentration of C-reactive protein after the 1<sup>st</sup> and 2<sup>nd</sup> endotoxin challenge

|                                                   | Overall          | 1 <sup>st</sup> LPS challenge | 2 <sup>nd</sup> LPS challenge |
|---------------------------------------------------|------------------|-------------------------------|-------------------------------|
| <b>N=</b>                                         | 9 subjects twice | 9                             | 9                             |
| Interleukin 8, AUC (pg*h/mL), (mean [SD])         | 883 (606)        | 1047 (583)                    | 718 (616)                     |
| Interleukin 8, Cmax (pg/mL), (mean [SD])          | 385 (250)        | 434 (234)                     | 336 (269)                     |
| Interleukin 10, AUC (pg*h/mL), (mean [SD])        | 1771 (802)       | 1941 (753)                    | 1600 (856)                    |
| Interleukin 10, Cmax (pg/mL), (mean [SD])         | 535 (300)        | 582 (331)                     | 487 (277)                     |
| Interleukin 6, AUC (pg*h/mL), (mean [SD])         | 2150 (2830)      | 2719 (2798)                   | 1581 (2909)                   |
| Interleukin 6, Cmax (pg/mL), (mean [SD])          | 868 (844)        | 1114 (761)                    | 623 (895)                     |
| TNF alpha, AUC (pg*h/mL), (mean [SD])             | 2019 (1365)      | 2459 (1191)                   | 1579 (1450)                   |
| TNF alpha, Cmax (pg/mL), (mean [SD])              | 704 (502)        | 859 (426)                     | 549 (548)                     |
| C-reactive protein, 24h Conc (mg/dL), (mean [SD]) | 3.0 (1.6)        | 3.2 (1.3)                     | 2.8 (1.8)                     |

**Supplementary Table 6** Analyses of variance (ANOVAs) testing the association of the LPS challenge (1<sup>st</sup> vs 2<sup>nd</sup>) and the interaction between the LPS challenge (1<sup>st</sup> vs 2<sup>nd</sup>) and the concentration per timepoint for each cytokine

|                | Effect of challenge (1st vs 2nd) |         |         | Interaction challenge:timepoint |         |         |
|----------------|----------------------------------|---------|---------|---------------------------------|---------|---------|
|                | Degree of freedom                | F value | p value | Degree of freedom               | F value | p value |
| Interleukin-8  | 1                                | 7.027   | 0.23    | 7                               | 2.365   | 0.0365  |
| Interleukin-10 | 1                                | 0.349   | 0.66    | 7                               | 0.789   | 0.6     |
| Interleukin-6  | 1                                | 13.38   | 0.17    | 7                               | 1.749   | 0.119   |
| TNF-alpha      | 1                                | 842.8   | 0.0219  | 7                               | 4.086   | 0.00133 |

**Supplementary Table 7** Comparisons of peak concentrations ( $C_{\max}$ ), time to reach peak concentrations ( $T_{\max}$ ), and areas under the curve (AUC) between the 1<sup>st</sup> and 2<sup>nd</sup> LPS challenge for (A) interleukin-8, (B) interleukin-10, (C) interleukin-6, and (D) tumor necrosis factor-alpha.

|                | Parameter                     | 1 <sup>st</sup> Challenge,<br>Mean (SD) | 2 <sup>nd</sup> Challenge,<br>Mean (SD) | Mean Difference (95% CI)     | P value |
|----------------|-------------------------------|-----------------------------------------|-----------------------------------------|------------------------------|---------|
| Interleukin-8  | $C_{\max}$ (pg/mL)            | 434.13 (234.06)                         | 335.73 (269.27)                         | -98.40 (-292.41, 95.62)      | 0.276   |
|                | $T_{\max}$ (h)                | 2.22 (0.67)                             | 2.00 (0.00)                             | -0.22 (-0.73, 0.29)          | 0.347   |
|                | AUC <sub>0-10</sub> (pg/mL*h) | 1047.41 (582.68)                        | 718.13 (615.53)                         | -329.28 (-679.04, 20.48)     | 0.062   |
| Interleukin-10 | $C_{\max}$ (pg/mL)            | 582.39 (330.79)                         | 487.43 (277.11)                         | -94.97 (-370.83, 180.90)     | 0.450   |
|                | $T_{\max}$ (h)                | 2.44 (0.88)                             | 2.39 (0.93)                             | -0.06 (-0.83, 0.72)          | 0.873   |
|                | AUC <sub>0-10</sub> (pg/mL*h) | 1941.08 (753.13)                        | 1600.01 (856.03)                        | -341.07 (-1011.12, 328.98)   | 0.274   |
| Interleukin-6  | $C_{\max}$ (pg/mL)            | 1113.84 (760.89)                        | 622.87 (894.90)                         | -490.96 (-877.88, -104.04)   | 0.019   |
|                | $T_{\max}$ (h)                | 2.22 (0.67)                             | 2.22 (0.67)                             | -0.00 (NA, NA)               | NA      |
|                | AUC <sub>0-10</sub> (pg/mL*h) | 2719.23 (2797.83)                       | 1581.12 (2908.53)                       | -1138.11 (-1985.01, -291.20) | 0.015   |
| TNF-alpha      | $C_{\max}$ (pg/mL)            | 858.79 (425.50)                         | 549.42 (548.29)                         | -309.38 (-621.37, 2.62)      | 0.052   |
|                | $T_{\max}$ (h)                | 1.78 (0.26)                             | 1.56 (0.30)                             | -0.22 (-0.56, 0.12)          | 0.169   |
|                | AUC <sub>0-10</sub> (pg/mL*h) | 2459.34 (1191.47)                       | 1579.38 (1450.09)                       | -879.96 (-1719.66, -40.26)   | 0.042   |

*Note: The statistical comparison is based on the paired-sample t-test.*



**Supplementary Table 8** Comparisons of peak concentrations ( $C_{\max}$ ), time to reach peak concentrations ( $T_{\max}$ ), and areas under the curve (AUC) between male and female subjects during the 1<sup>st</sup> and 2<sup>nd</sup> LPS challenge.

| <b>1<sup>st</sup> LPS Challenge</b> |                               |                         |                           |                             |         |
|-------------------------------------|-------------------------------|-------------------------|---------------------------|-----------------------------|---------|
|                                     | Parameter                     | Males, Mean (SD)<br>N=5 | Females, Mean (SD)<br>N=4 | Mean difference<br>(95% CI) | P value |
| <b>Interleukin-8</b>                | $C_{\max}$ (pg/mL)            | 400 (274)               | 476 (204)                 | 76 (-301, 453)              | 0.649   |
|                                     | $T_{\max}$ (h)                | 2.4 (0.9)               | 2.0 (0.0)                 | -0.4 (-1.5, 0.7)            | 0.407   |
|                                     | AUC <sub>0-10</sub> (pg/mL*h) | 960 (500)               | 1157 (737)                | 197 (-904, 1299)            | 0.666   |
| <b>Interleukin-10</b>               | $C_{\max}$ (pg/mL)            | 453 (140)               | 744 (451)                 | 290 (-401, 981)             | 0.292   |
|                                     | $T_{\max}$ (h)                | 2.8 (1.1)               | 2.0 (0.0)                 | -0.8 (-2.1, 0.5)            | 0.193   |
|                                     | AUC <sub>0-10</sub> (pg/mL*h) | 1611 (422)              | 2353 (932)                | 741.9 (-656, 2139)          | 0.214   |
| <b>Interleukin-6</b>                | $C_{\max}$ (pg/mL)            | 757 (428)               | 986 (447)                 | 230 (-479, 938)             | 0.463   |
|                                     | $T_{\max}$ (h)                | 1.7 (0.3)               | 1.9 (0.3)                 | 0.2 (-0.2, 0.6)             | 0.351   |
|                                     | AUC <sub>0-10</sub> (pg/mL*h) | 2160 (1157)             | 2833 (1290)               | 673 (-1337, 2682)           | 0.446   |
| <b>TNF-alpha</b>                    | $C_{\max}$ (pg/mL)            | 938 (434)               | 1333 (1085)               | 395 (-1244, 2033)           | 0.533   |
|                                     | $T_{\max}$ (h)                | 2.0 (0.0)               | 2.5 (1.0)                 | 0.5 (-0.5, 1.5)             | 0.292   |
|                                     | AUC <sub>0-10</sub> (pg/mL*h) | 2101 (1041)             | 3491 (4242)               | 1390 (-5189, 7969)          | 0.564   |
| <b>2<sup>nd</sup> LPS Challenge</b> |                               |                         |                           |                             |         |
|                                     |                               | Males,<br>Mean (SD)     | Females,<br>Mean (SD)     | Mean difference<br>(95% CI) | P value |
| <b>Interleukin-8</b>                | $C_{\max}$ (pg/mL)            | 230 (93)                | 468 (374)                 | 238 (-341, 817)             | 0.295   |
|                                     | $T_{\max}$ (h)                | 2.0 (0.0)               | 2.0 (0.0)                 | 0.0 (NA,NA)                 | NA      |
|                                     | AUC <sub>0-10</sub> (pg/mL*h) | 457 (117)               | 1045 (858)                | 588 (-765, 1941)            | 0.264   |
| <b>Interleukin-10</b>               | $C_{\max}$ (pg/mL)            | 442 (321)               | 544 (244)                 | 101 (-344, 547)             | 0.607   |
|                                     | $T_{\max}$ (h)                | 2.3 (1.0)               | 2.5 (1.0)                 | 0.2 (-1.4, 1.8)             | 0.772   |
|                                     | AUC <sub>0-10</sub> (pg/mL*h) | 1562 (1014)             | 1647 (760)                | 85 (-1314, 1485)            | 0.890   |
| <b>Interleukin-6</b>                | $C_{\max}$ (pg/mL)            | 274 (81)                | 894 (713)                 | 620 (-507, 1747)            | 0.180   |
|                                     | $T_{\max}$ (h)                | 1.50 (0.4)              | 1.6 (0.3)                 | 0.1 (-0.4, 0.6)             | 0.555   |
|                                     | AUC <sub>0-10</sub> (pg/mL*h) | 826 (198)               | 2521 (1851)               | 1695 (-1234, 4624)          | 0.164   |
| <b>TNF-alpha</b>                    | $C_{\max}$ (pg/mL)            | 175 (73)                | 1183 (1173)               | 1008 (-855, 2871)           | 0.184   |
|                                     | $T_{\max}$ (h)                | 2.0 (0.0)               | 2.5 (1.0)                 | 0.5 (-0.5, 1.5)             | 0.292   |
|                                     | AUC <sub>0-10</sub> (pg/mL*h) | 377 (155)               | 3087 (4133)               | 2710 (-3862, 9283)          | 0.281   |

*Note: The statistical comparison is based on the independent-sample t-test.*

## Figures

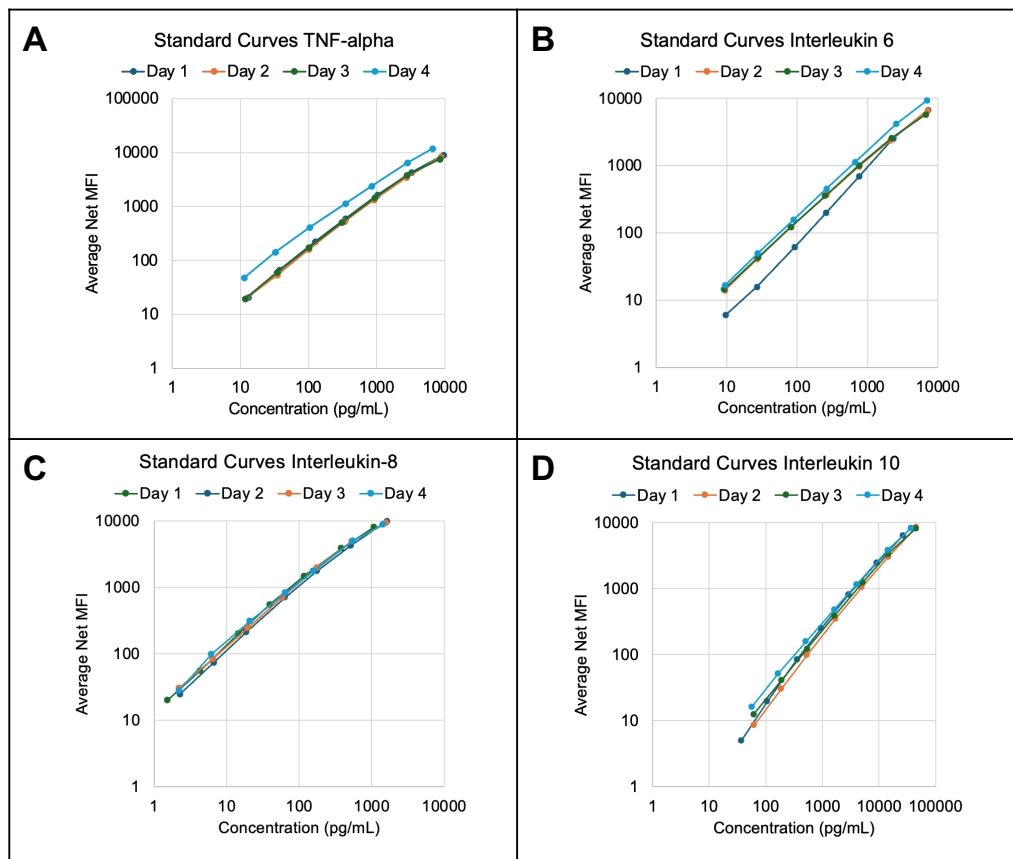

**Supplementary Figure 1** Standard curves for (A) Tumor necrosis-alpha, (B) interleukin-6, (C)interleukin-8, and (D) interleukin-10. The standard curves were created on four different measurement days

## Cytokine Responses: 1st vs. 2nd Challenge

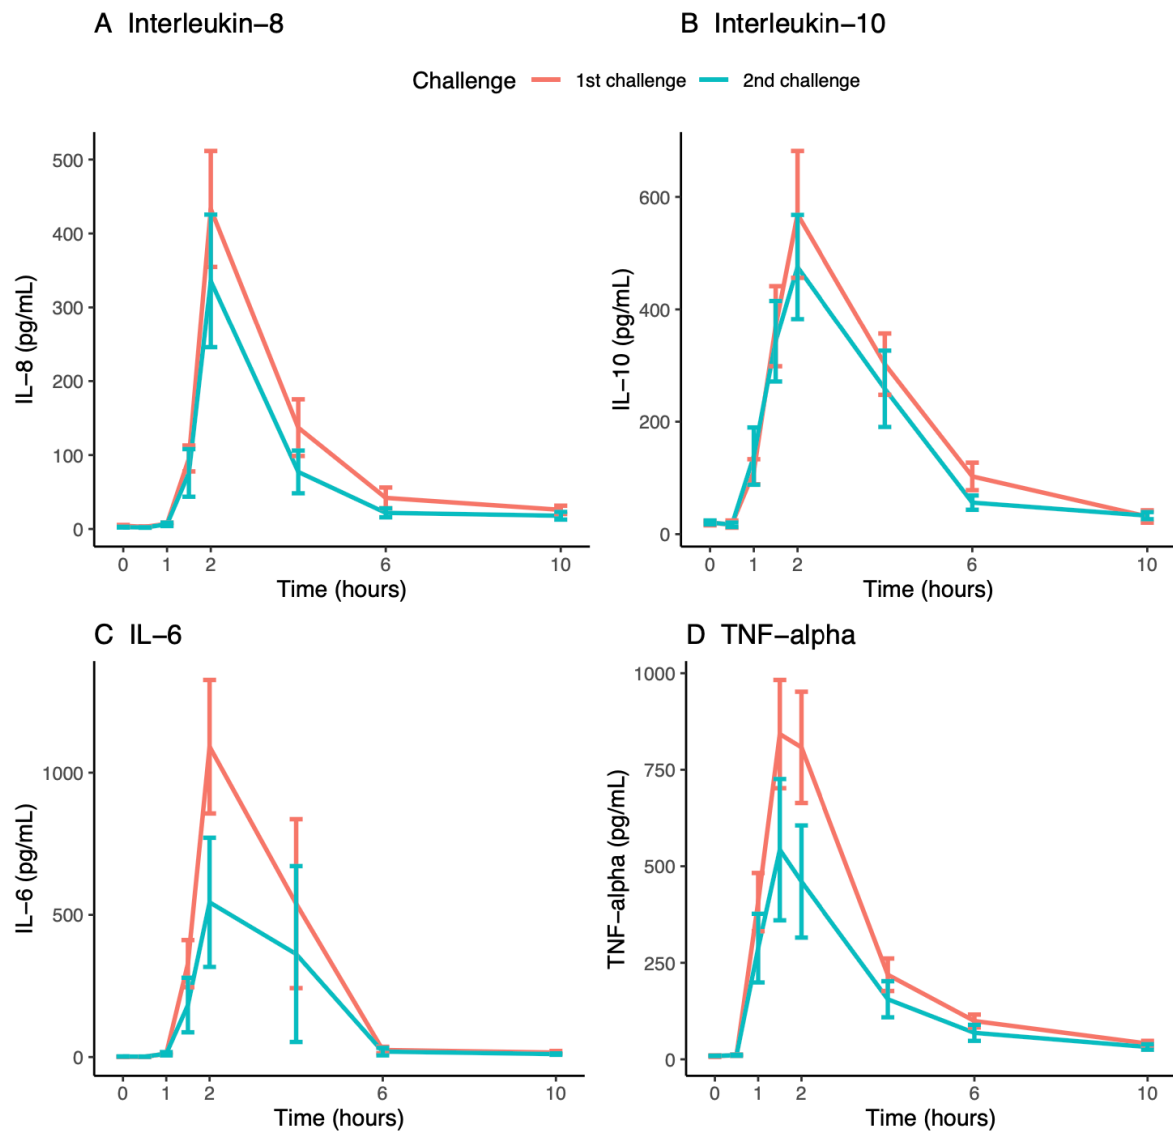

**Supplementary Figure 2** Individual concentration-time profiles between the 1<sup>st</sup> (red line) and 2<sup>nd</sup> (green line) LPS challenge for (A) interleukin-8, (B) interleukin-10, (C) interleukin-6, and (D) tumor necrosis factor-alpha. Error bars indicate the standard error.

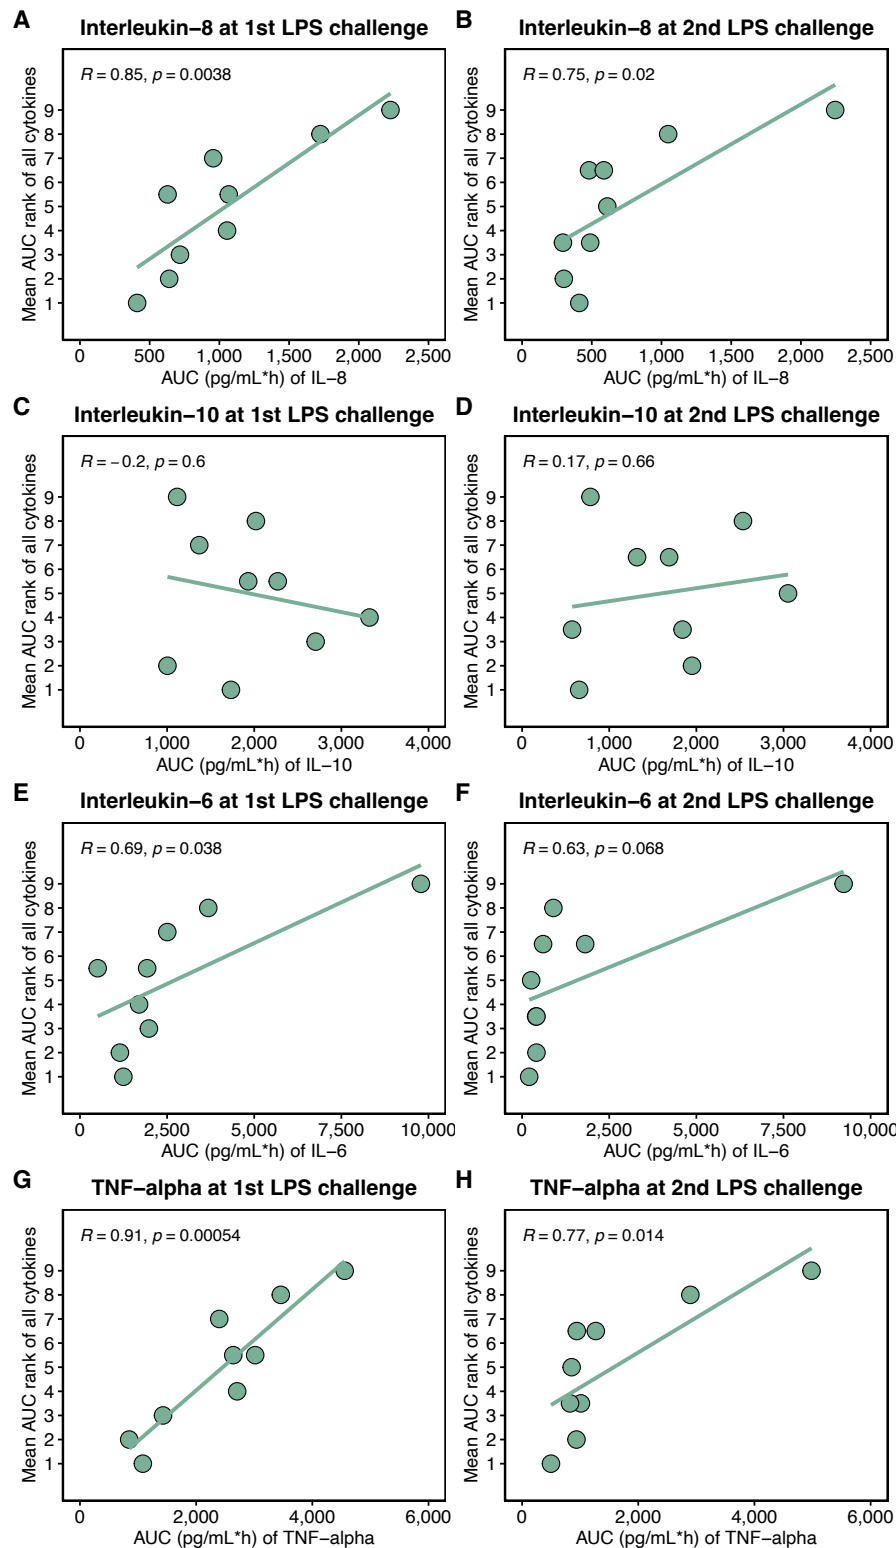

**Supplementary Figure 3** Dot plots assessing the correlation between the individual cytokine AUCs<sub>0-10</sub> and the mean AUC rank during the 1<sup>st</sup> and 2<sup>nd</sup> LPS challenge. (A) interleukin-8 at 1<sup>st</sup> LPS challenge, (B) interleukin-8 at 2<sup>nd</sup> LPS challenge, (C) interleukin-10 at 1<sup>st</sup> LPS challenge, (D) interleukin-10 at 2<sup>nd</sup> LPS challenge, (E) interleukin-6 at 1<sup>st</sup> LPS challenge, (F) interleukin-6 at 2<sup>nd</sup> LPS challenge, (G) TNF-alpha at 1<sup>st</sup> LPS challenge, (G) TNF-alpha at 2<sup>nd</sup> LPS challenge.

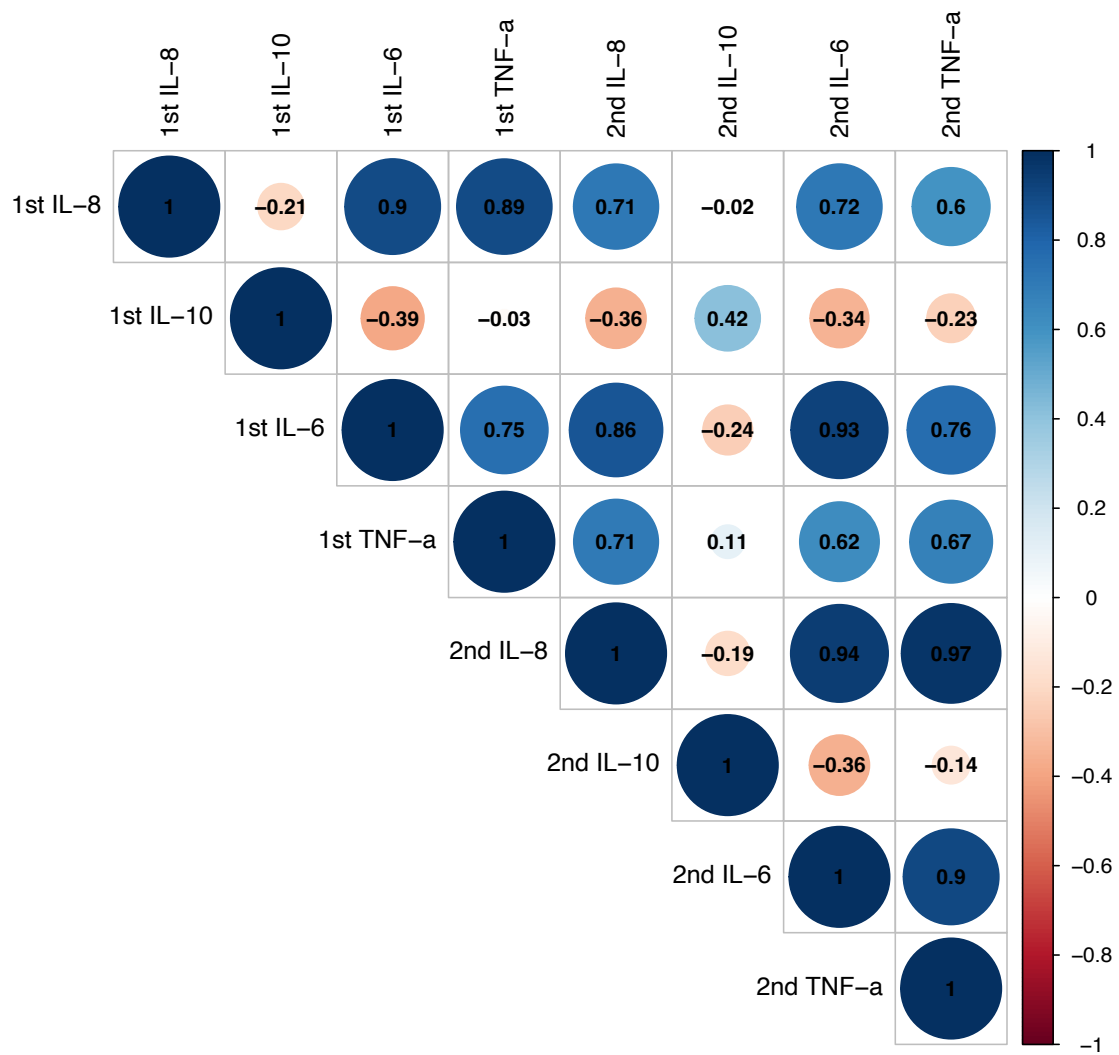

**Supplementary Figure 4** Correlation plot of individual cytokine AUCs<sub>0-10</sub> during the 1<sup>st</sup> and 2<sup>nd</sup> LPS challenge. The values and the size of the circle indicate the degree of correlation, expressed by the Pearson correlation coefficient R.

## Difference in B cell subsets changes between the 1st and 2nd LPS challenge

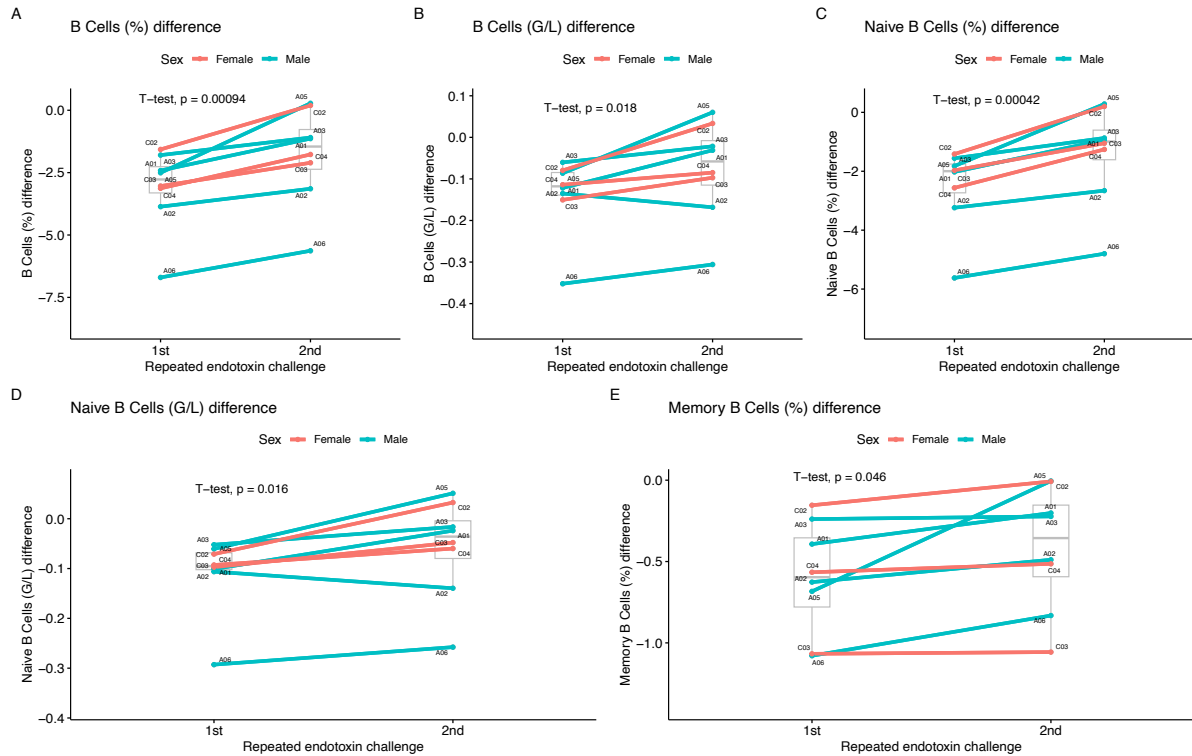

**Supplementary Figure 5** Selection of statistically significant changes ( $\Delta$  baseline to 4h) in B lymphocyte subsets between the 1<sup>st</sup> and 2<sup>nd</sup> LPS challenge

## Difference in T cell subsets changes between the 1st and 2nd LPS challenge

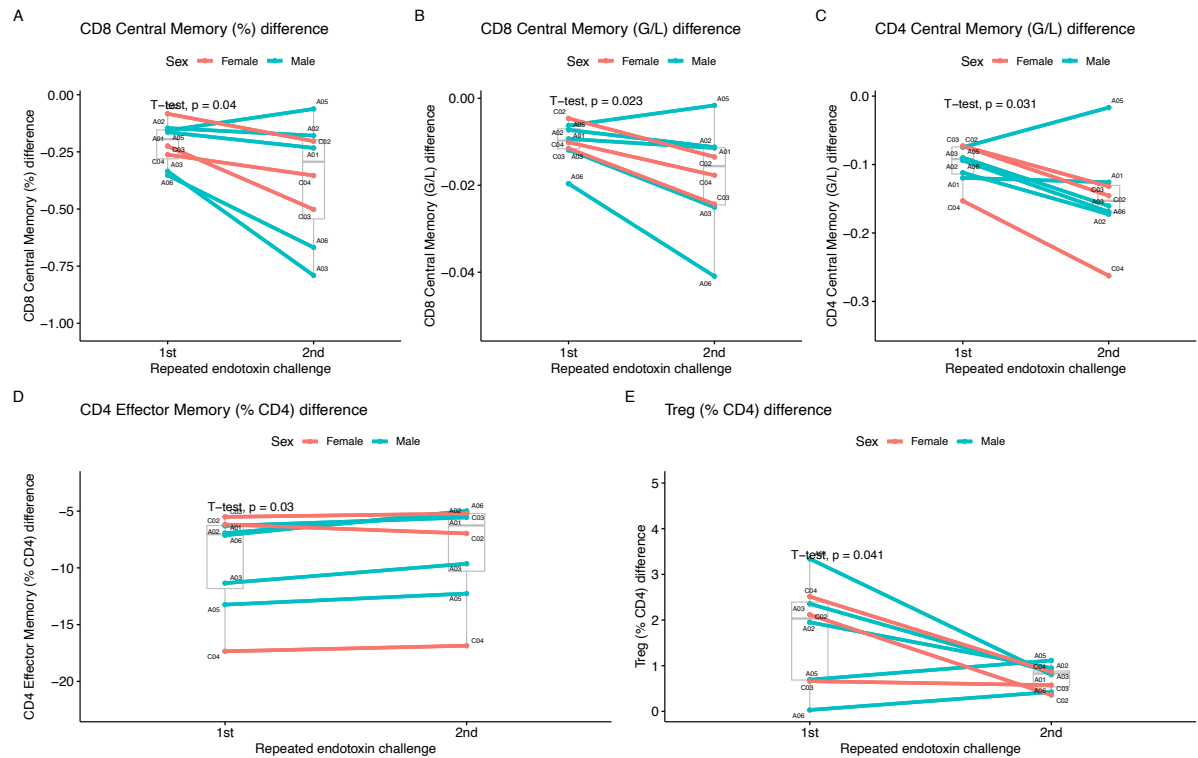

**Supplementary Figure 6** Selection of statistically significant changes ( $\Delta$  baseline to 4h) in T lymphocyte subsets between the 1<sup>st</sup> and 2<sup>nd</sup> LPS challenge

# **Difference in dendritic cell subsets and basophils changes between the 1st and 2nd LPS challenge**

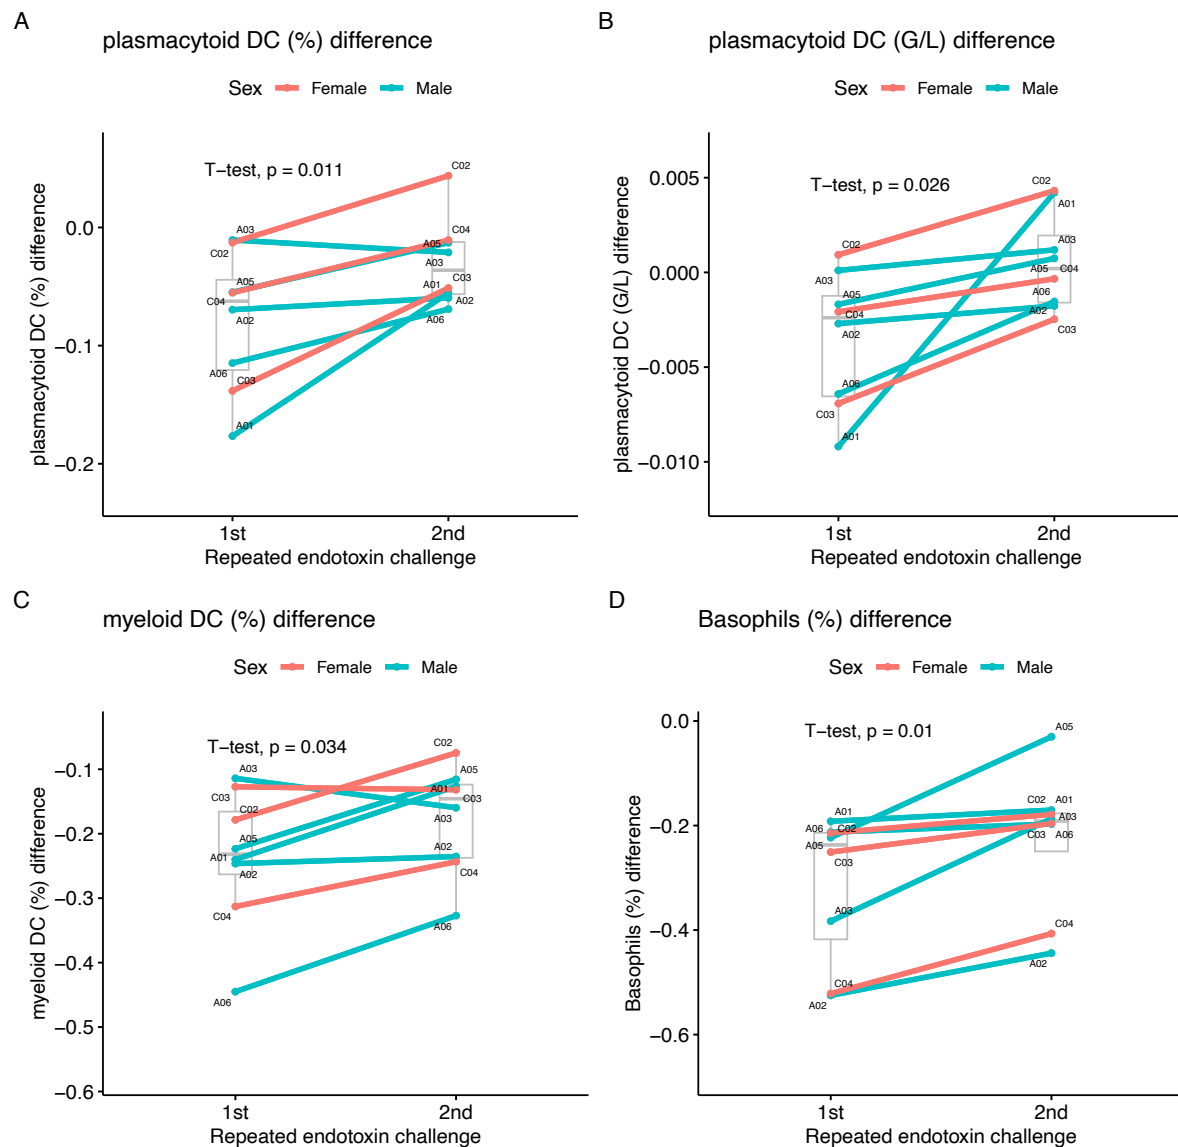

**Supplementary Figure 7** Selection of statistically significant changes ( $\Delta$  baseline to 4h) in dendritic cells subsets and basophils between the 1<sup>st</sup> and 2<sup>nd</sup> LPS challenge



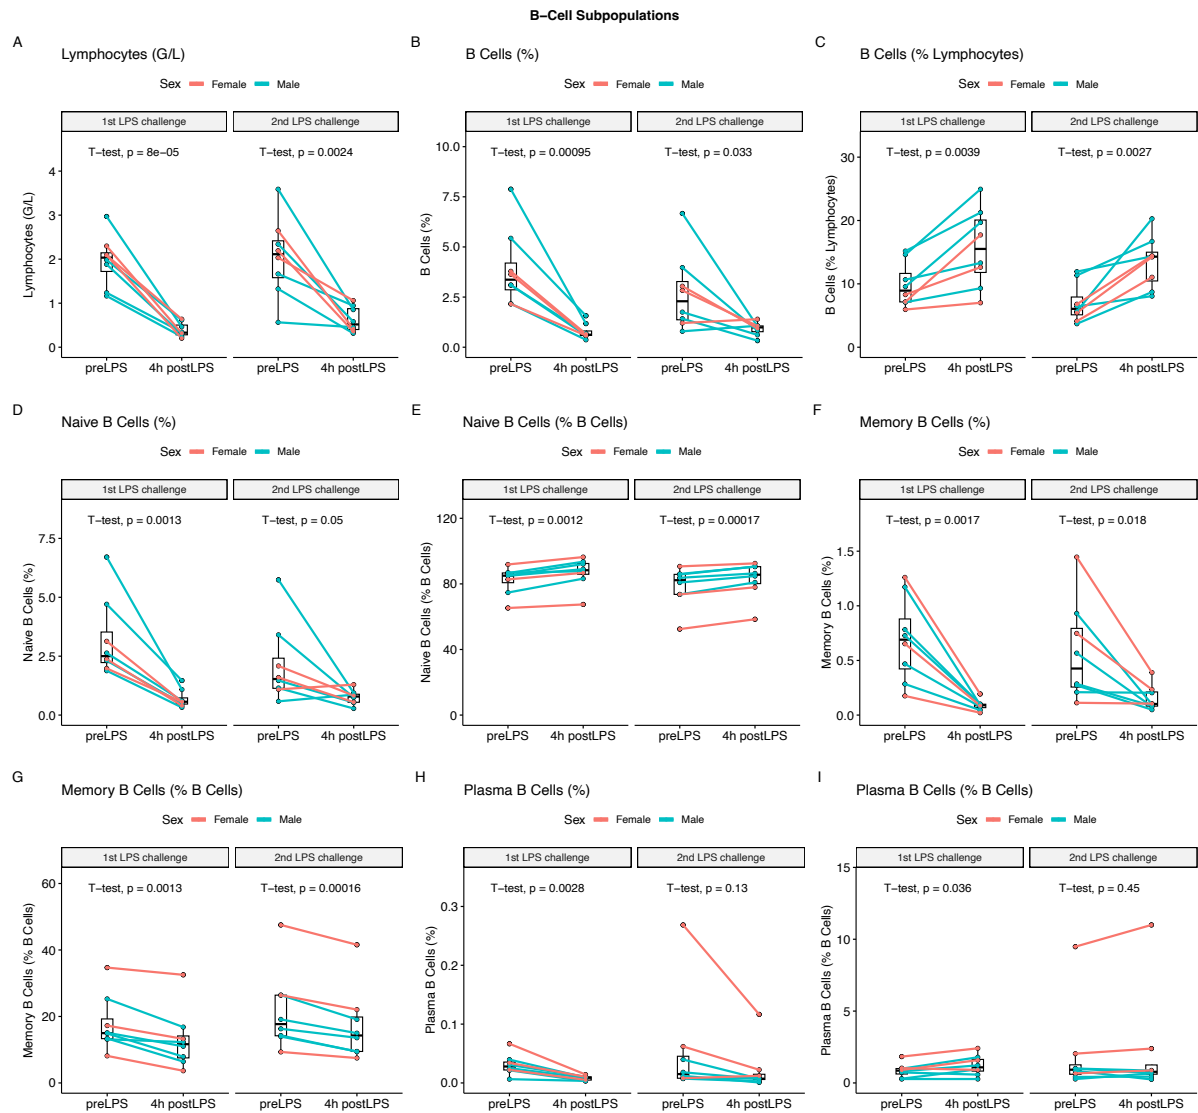

**Supplementary Figure 8 B** lymphocyte subpopulations before and 4h after LPS administration at the 1<sup>st</sup> and 2<sup>nd</sup> LPS challenge

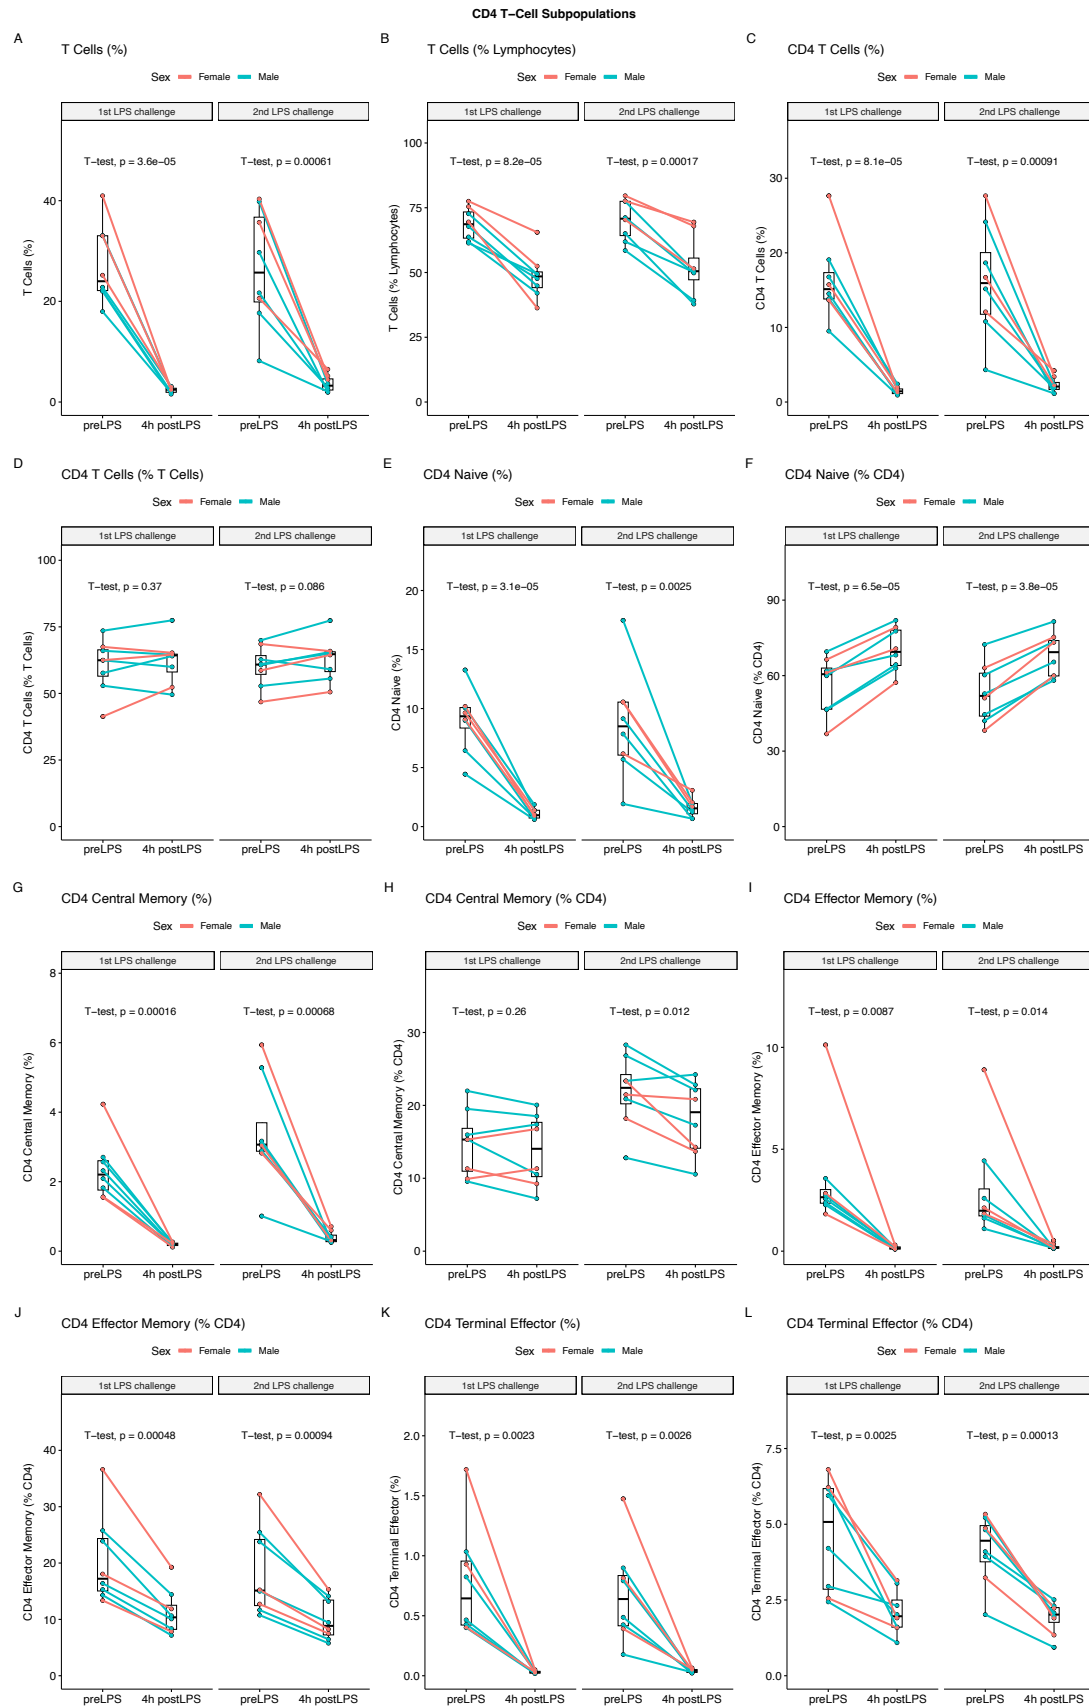

**Supplementary Figure 9** CD4 T lymphocyte subpopulations before and 4h after LPS administration at the 1<sup>st</sup> and 2<sup>nd</sup> LPS challenge

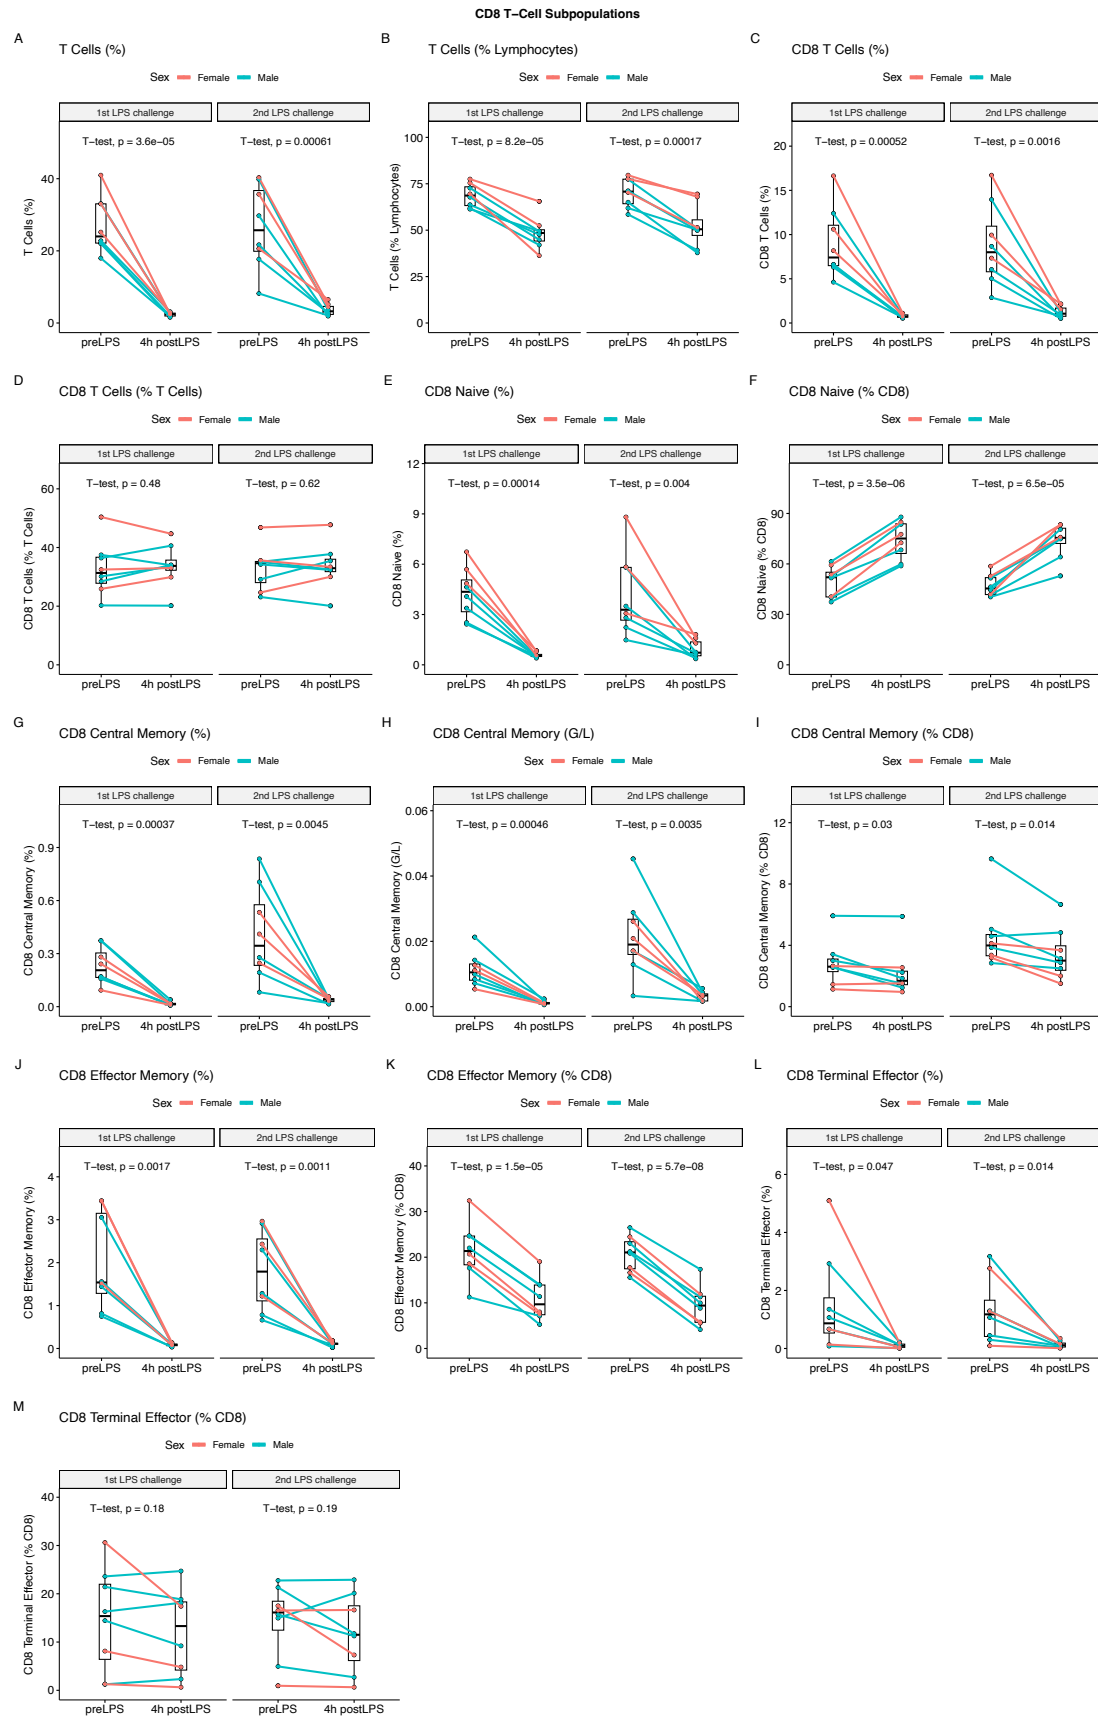

**Supplementary Figure 10** CD8 T lymphocyte subpopulations before and 4h after LPS administration at the 1<sup>st</sup> and 2<sup>nd</sup> LPS challenge

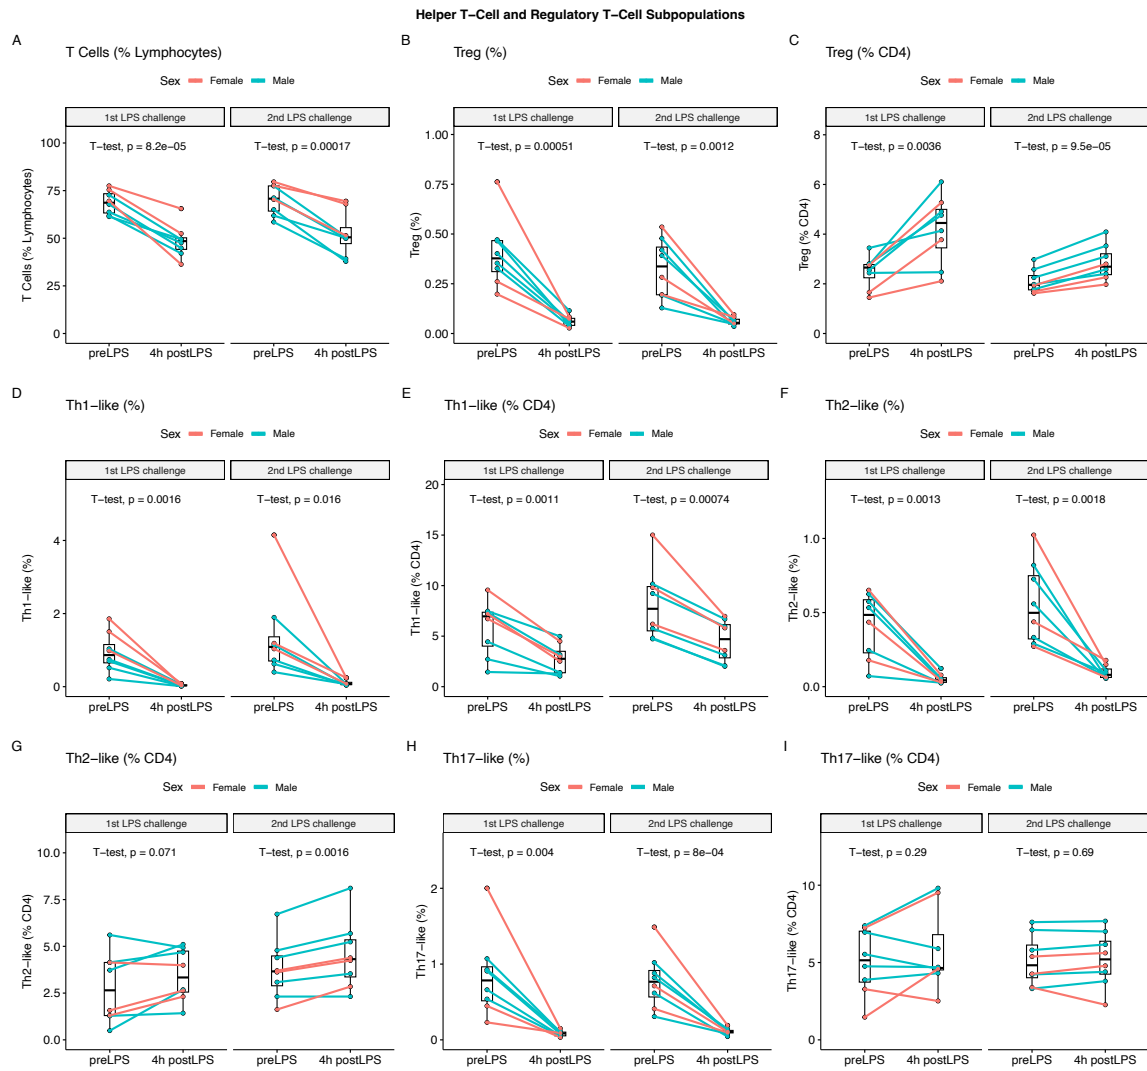

**Supplementary Figure 11** Helper T lymphocyte and Regulatory T lymphocyte subpopulations before and 4h after LPS administration at the 1<sup>st</sup> and 2<sup>nd</sup> LPS challenge

### Natural Killer T-Cell and Gamma-Delta T-Cell Populations

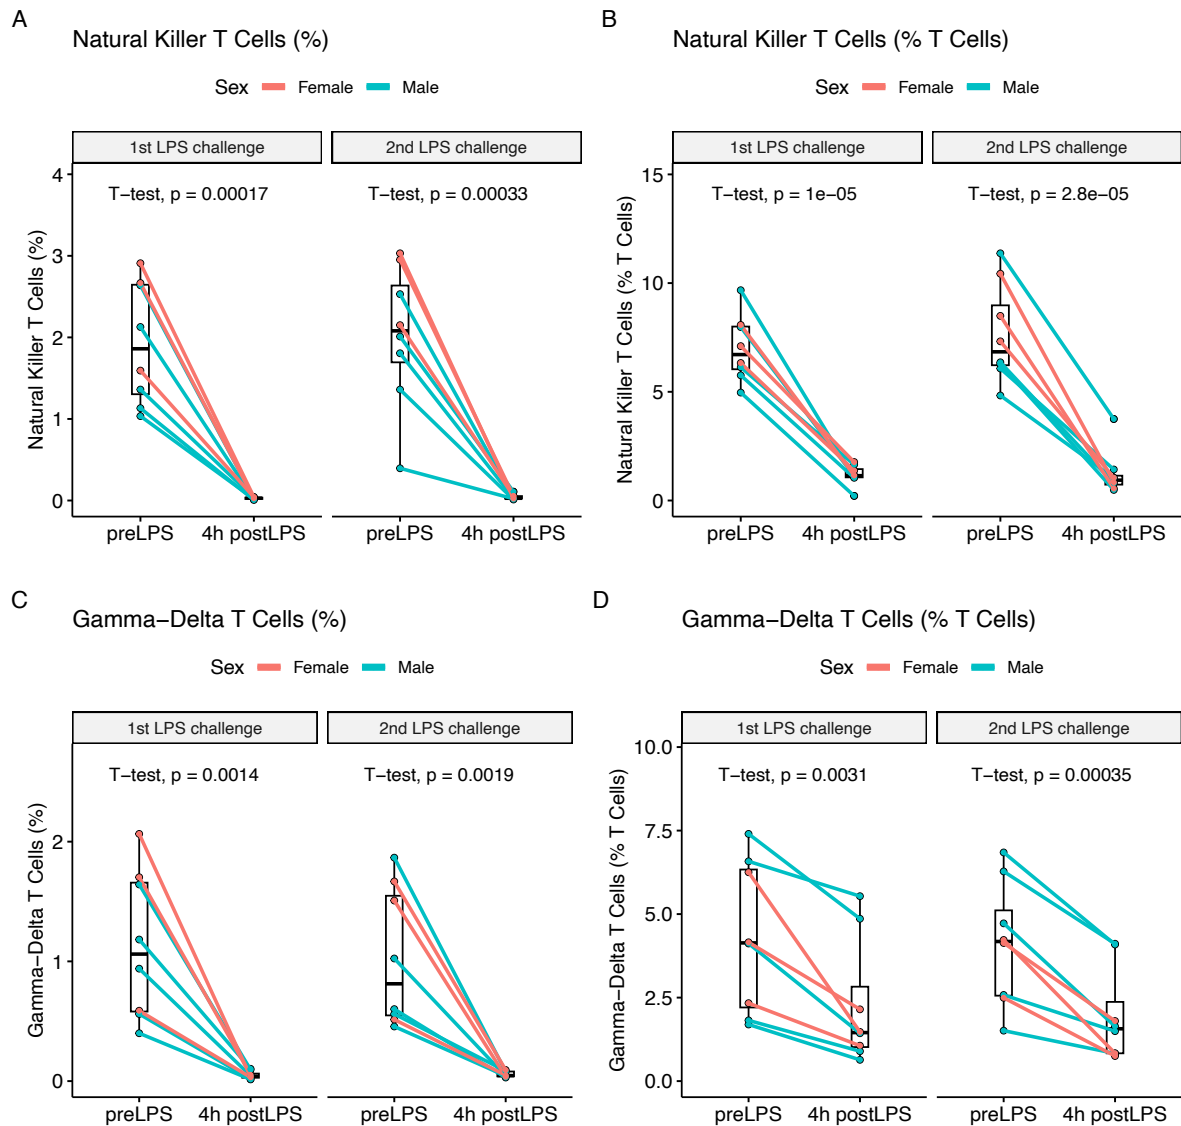

**Supplementary Figure 12** Natural Killer T lymphocyte and Gamma-Delta T lymphocyte subpopulations before and 4h after LPS administration at the 1<sup>st</sup> and 2<sup>nd</sup> LPS challenge

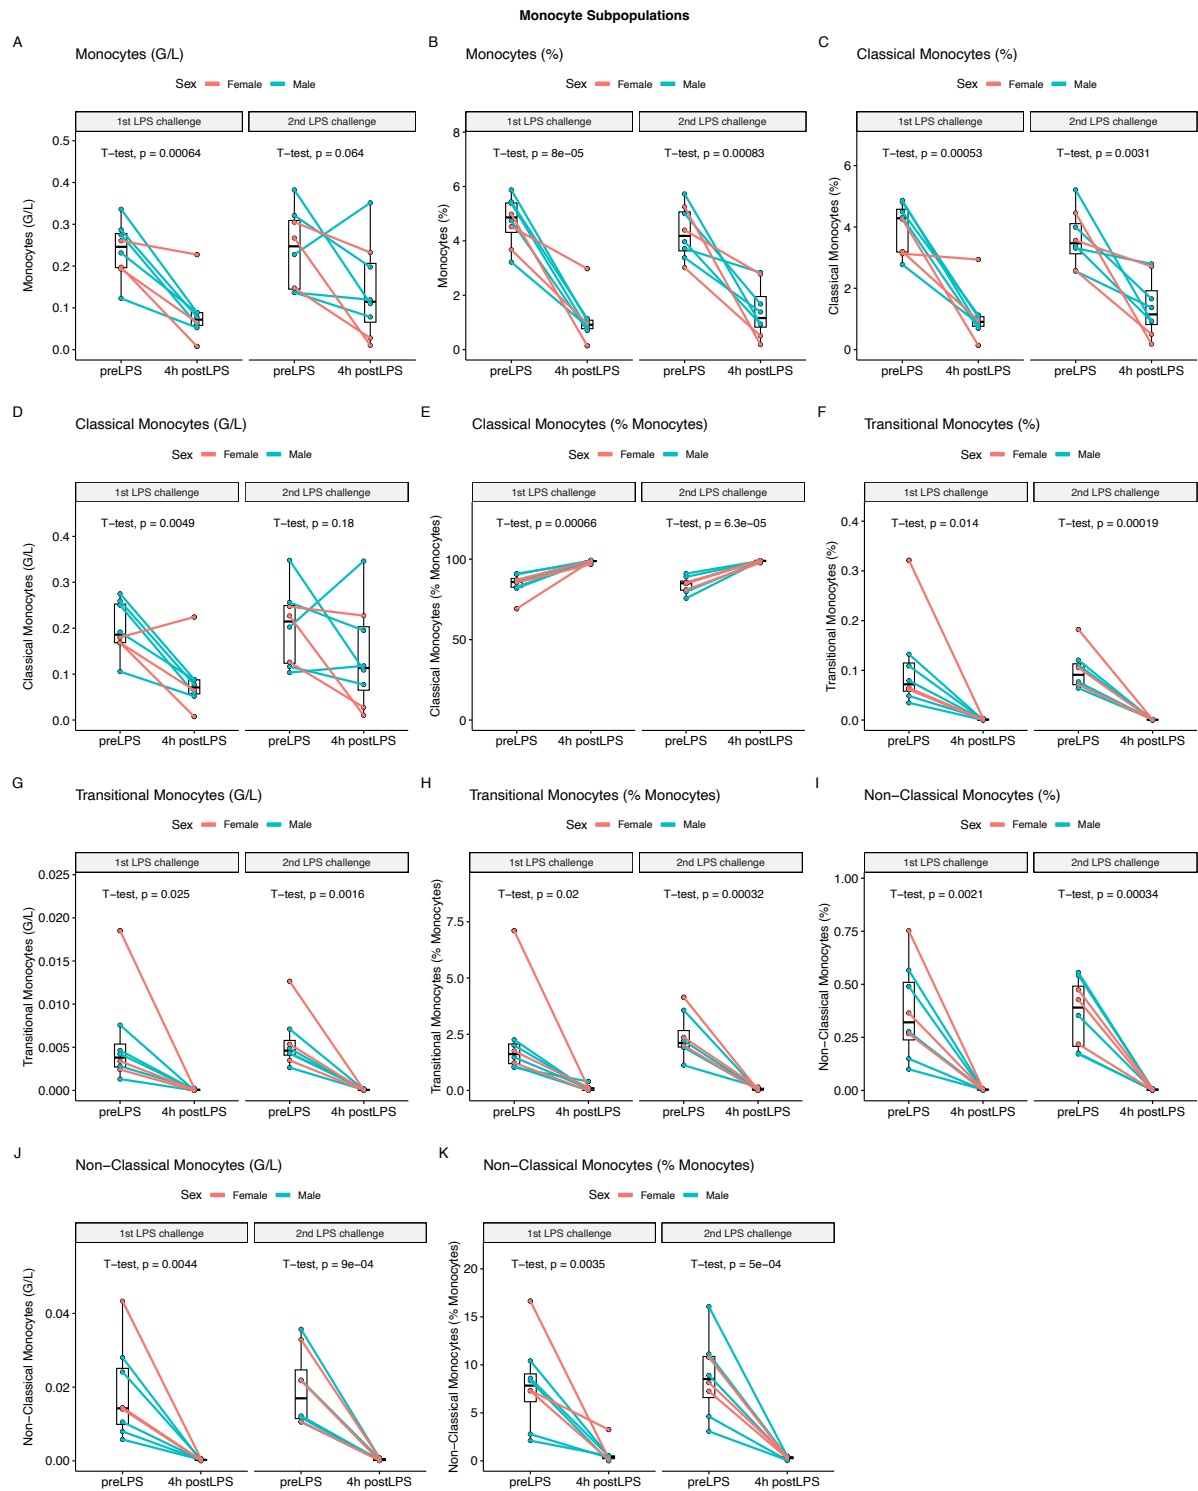

**Supplementary Figure 13** Monocyte subpopulations before and 4h after LPS administration at the 1<sup>st</sup> and 2<sup>nd</sup> LPS challenge

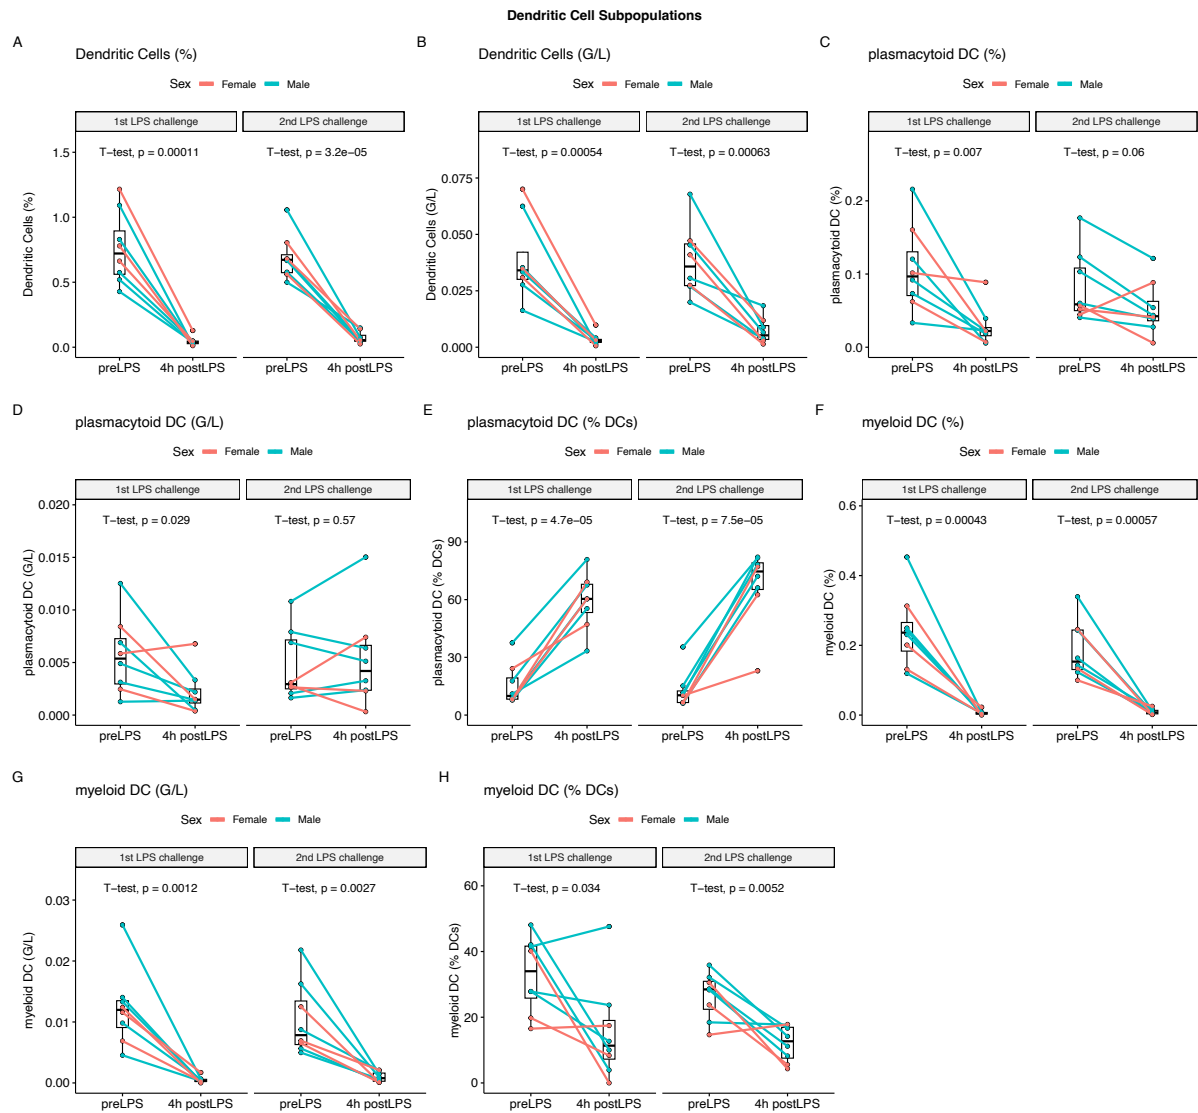

**Supplementary Figure 14** Dendritic cell subpopulations before and 4h after LPS administration at the 1<sup>st</sup> and 2<sup>nd</sup> LPS challenge

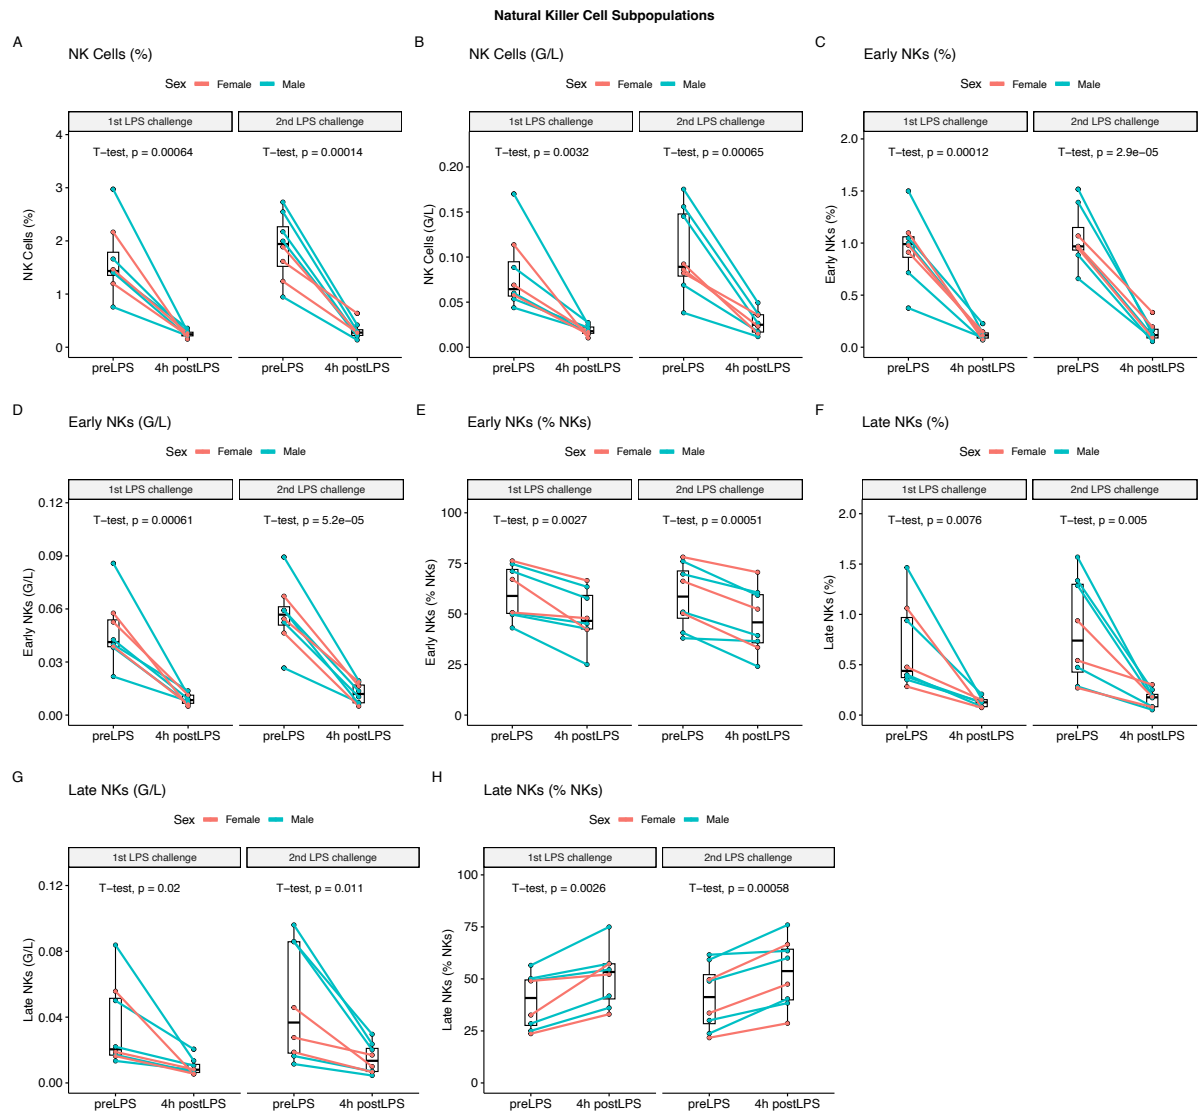

**Supplementary Figure 15** Natural Killer cell subpopulations before and 4h after LPS administration at the 1<sup>st</sup> and 2<sup>nd</sup> LPS challenge



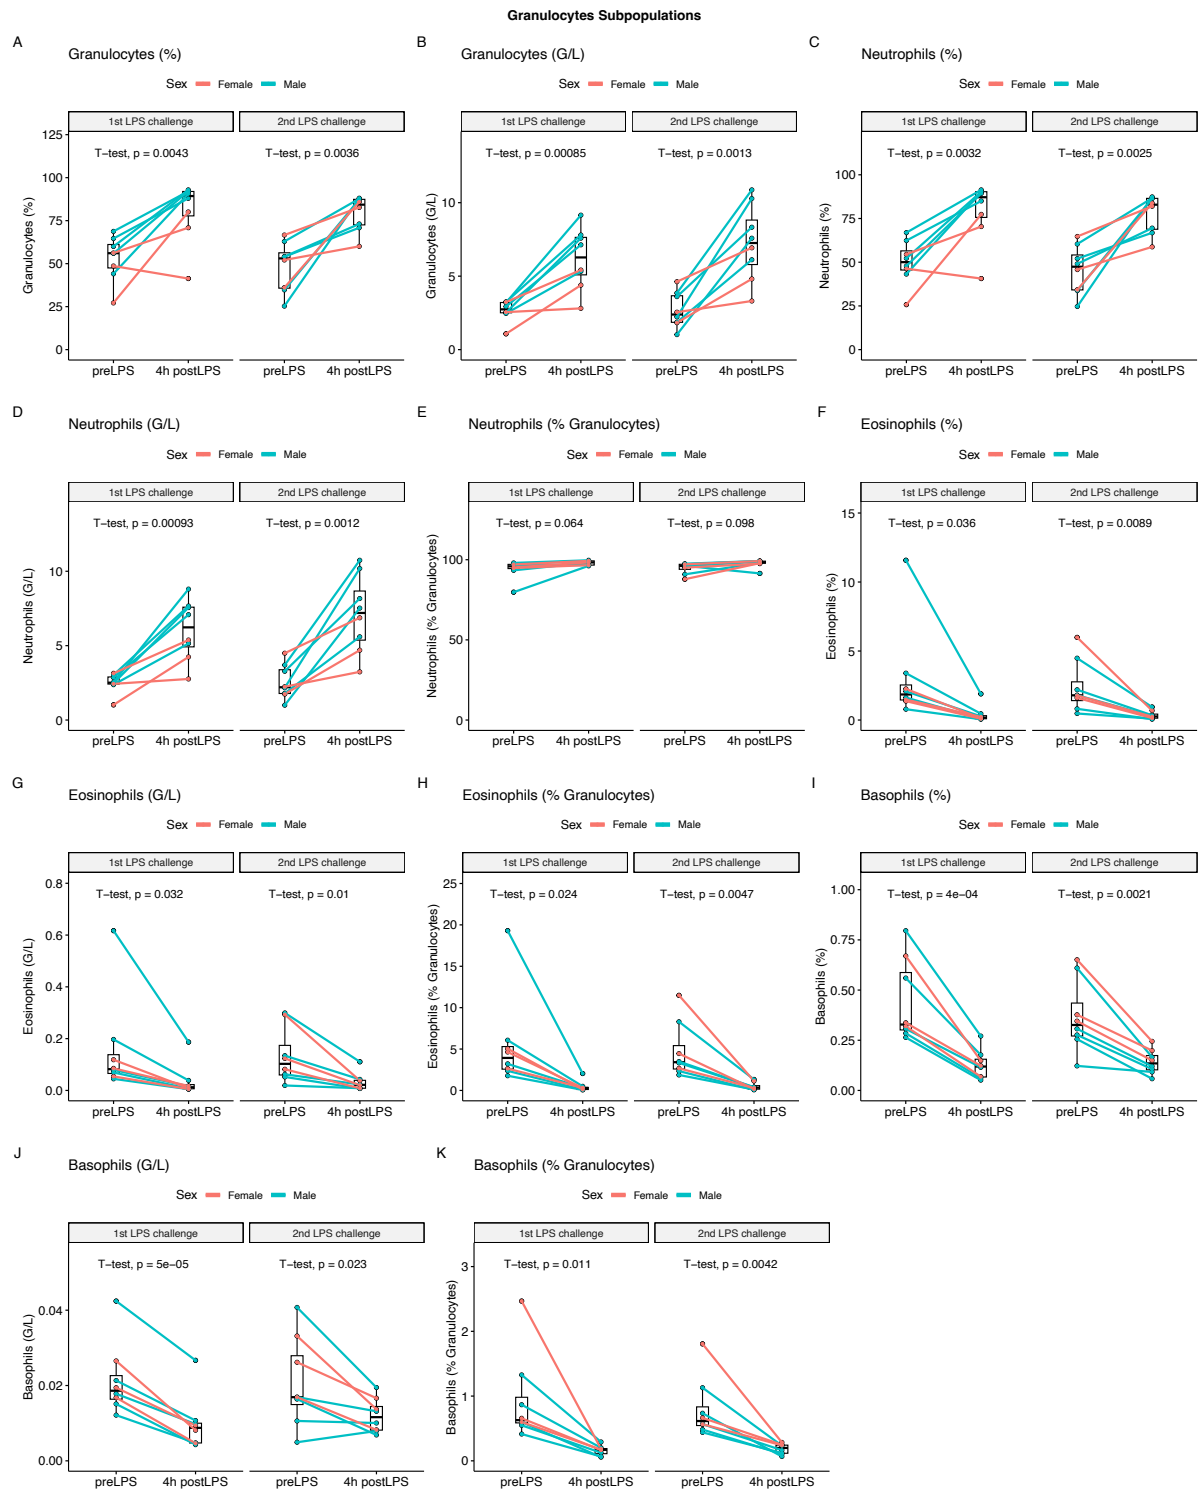

**Supplementary Figure 16** Granulocyte subpopulations before and 4h after LPS administration at the 1<sup>st</sup> and 2<sup>nd</sup> LPS challenge

# **Correlation of difference (preLPS to 4h postLPS) in B cell populations between 1st and 2nd endotoxin challenge**

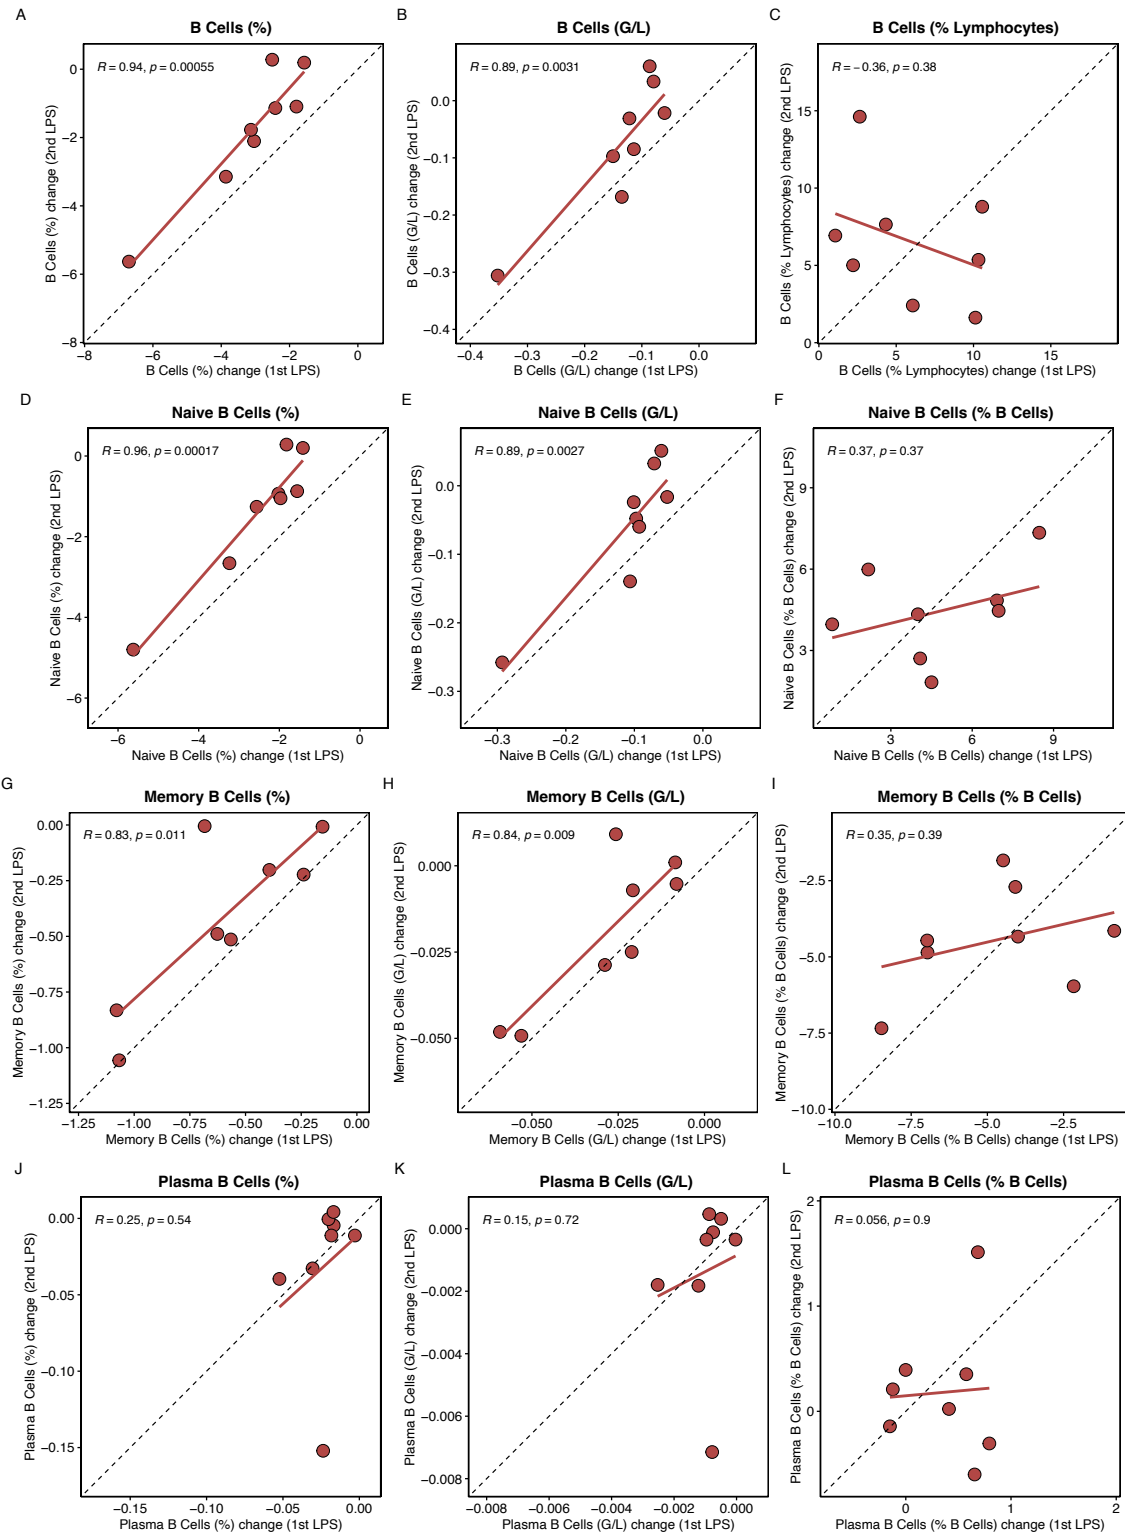

**Supplementary Figure 17** Correlation of difference ( $\Delta$  baseline to 4h) in B lymphocyte subpopulations between 1<sup>st</sup> and 2<sup>nd</sup> endotoxin challenge

**Correlation of difference (preLPS to 4h postLPS) in CD4 T cell populations between 1st and 2nd endotoxin challenge**

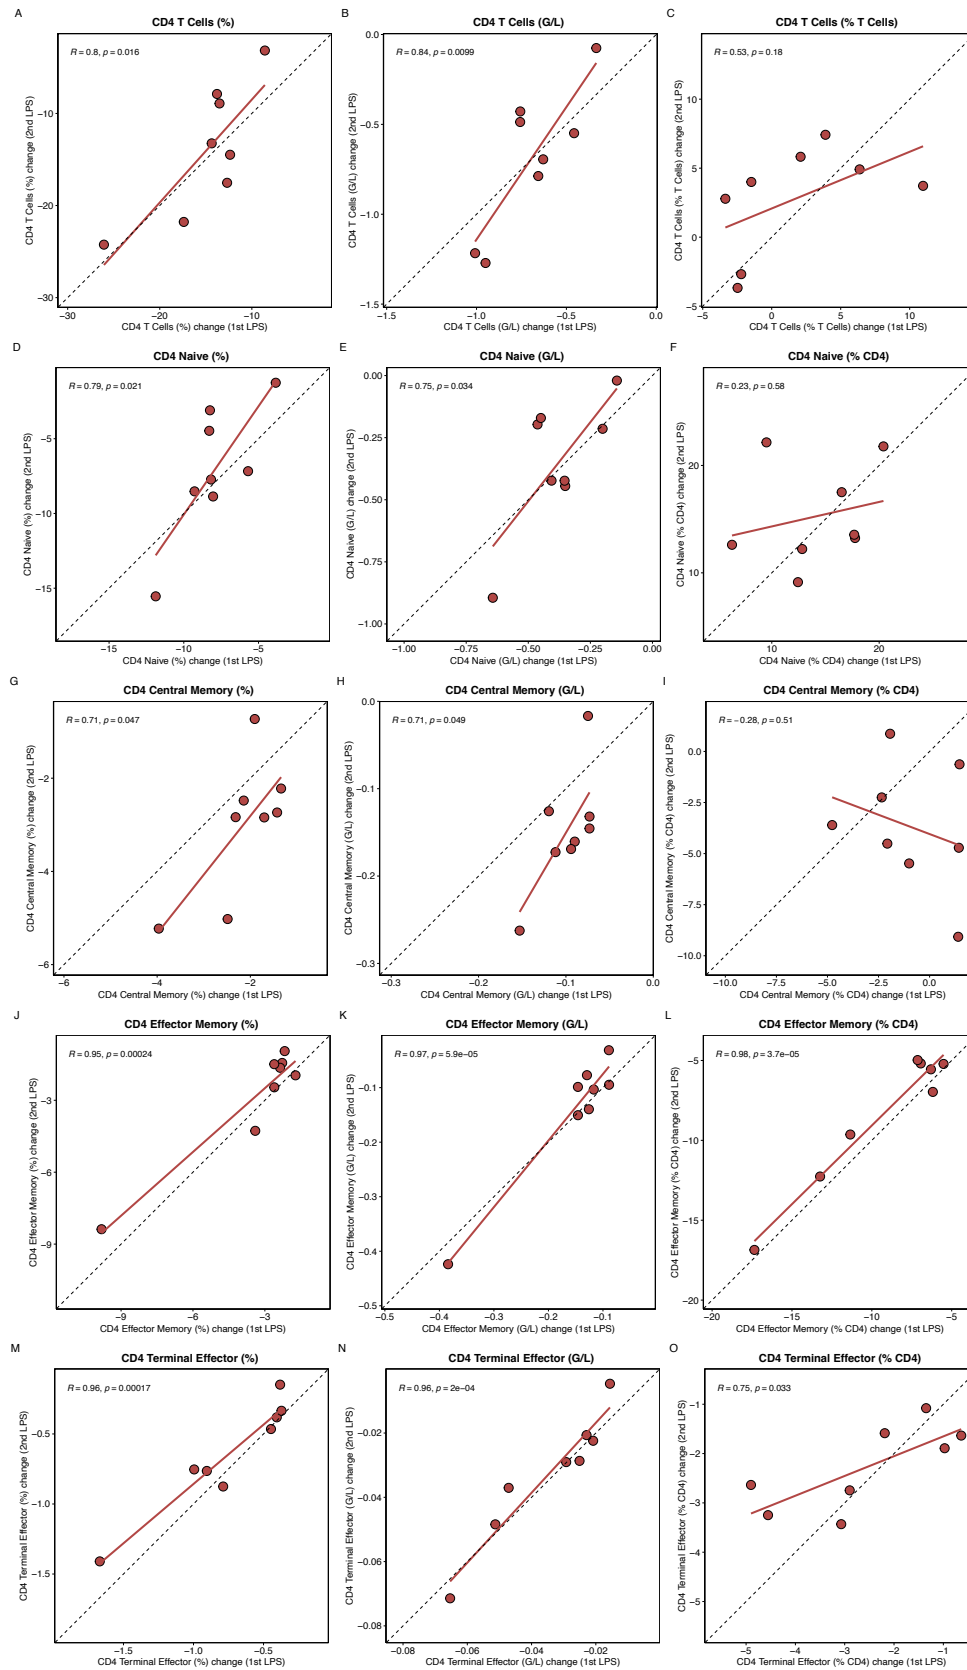

**Supplementary Figure 18** Correlation of difference ( $\Delta$  baseline to 4h) in CD4 T lymphocyte subpopulations between 1<sup>st</sup> and 2<sup>nd</sup> endotoxin challenge

**Correlation of difference (preLPS to 4h postLPS) in CD8 T cell populations between 1st and 2nd endotoxin challenge**

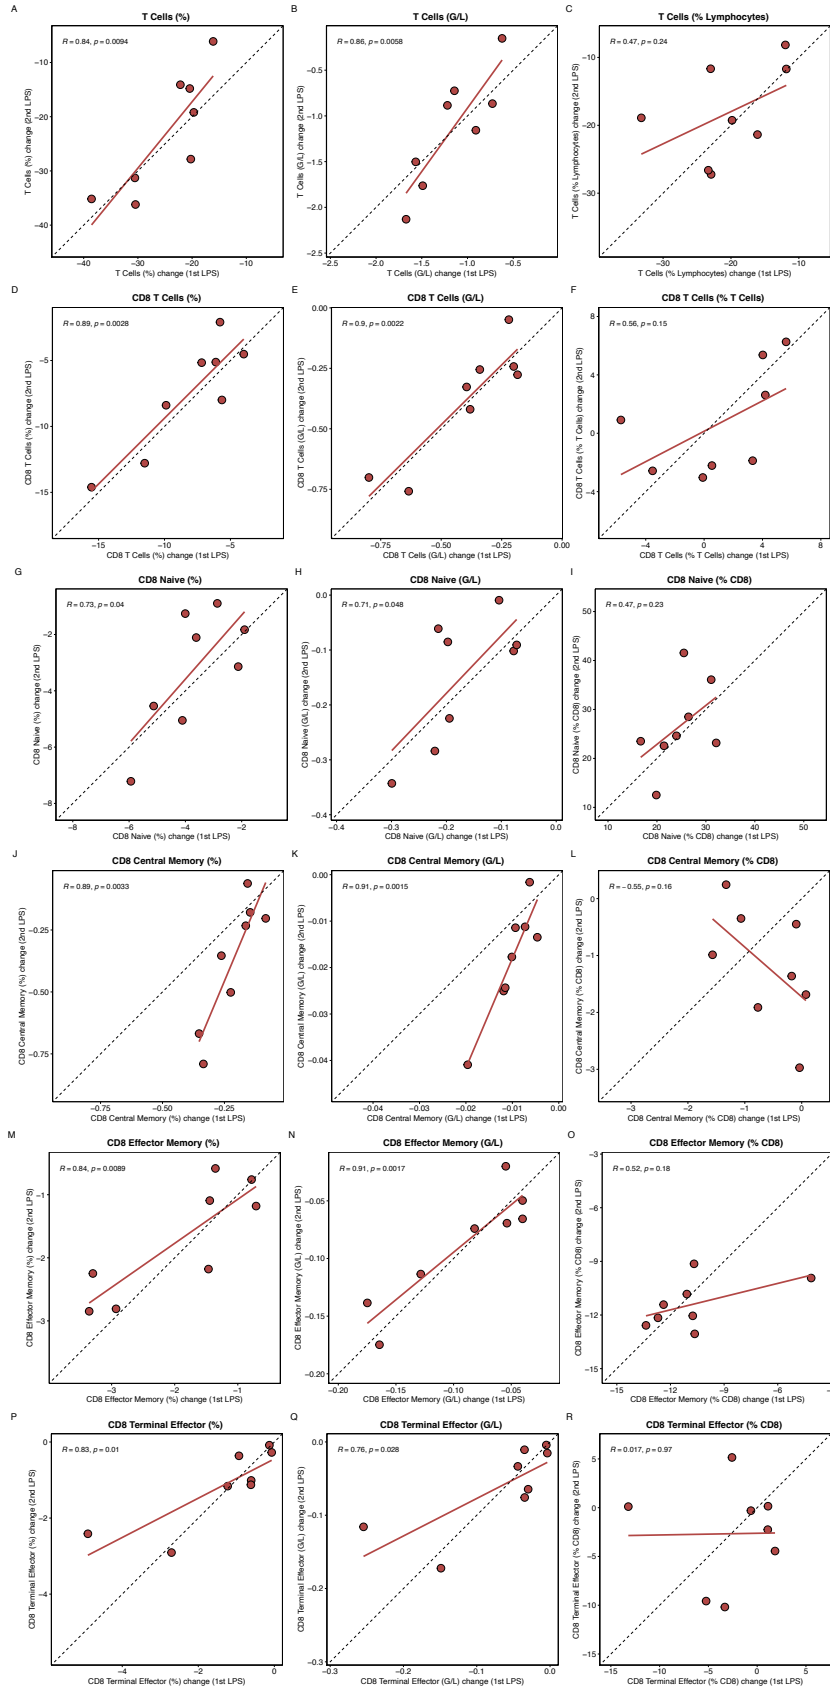

**Supplementary Figure 19** Correlation of difference ( $\Delta$  baseline to 4h) in CD8 T lymphocyte subpopulations between 1<sup>st</sup> and 2<sup>nd</sup> endotoxin challenge

**Correlation of difference (preLPS to 4h postLPS) in helper and regulatory T cell populations between 1st and 2nd endotoxin challenge**

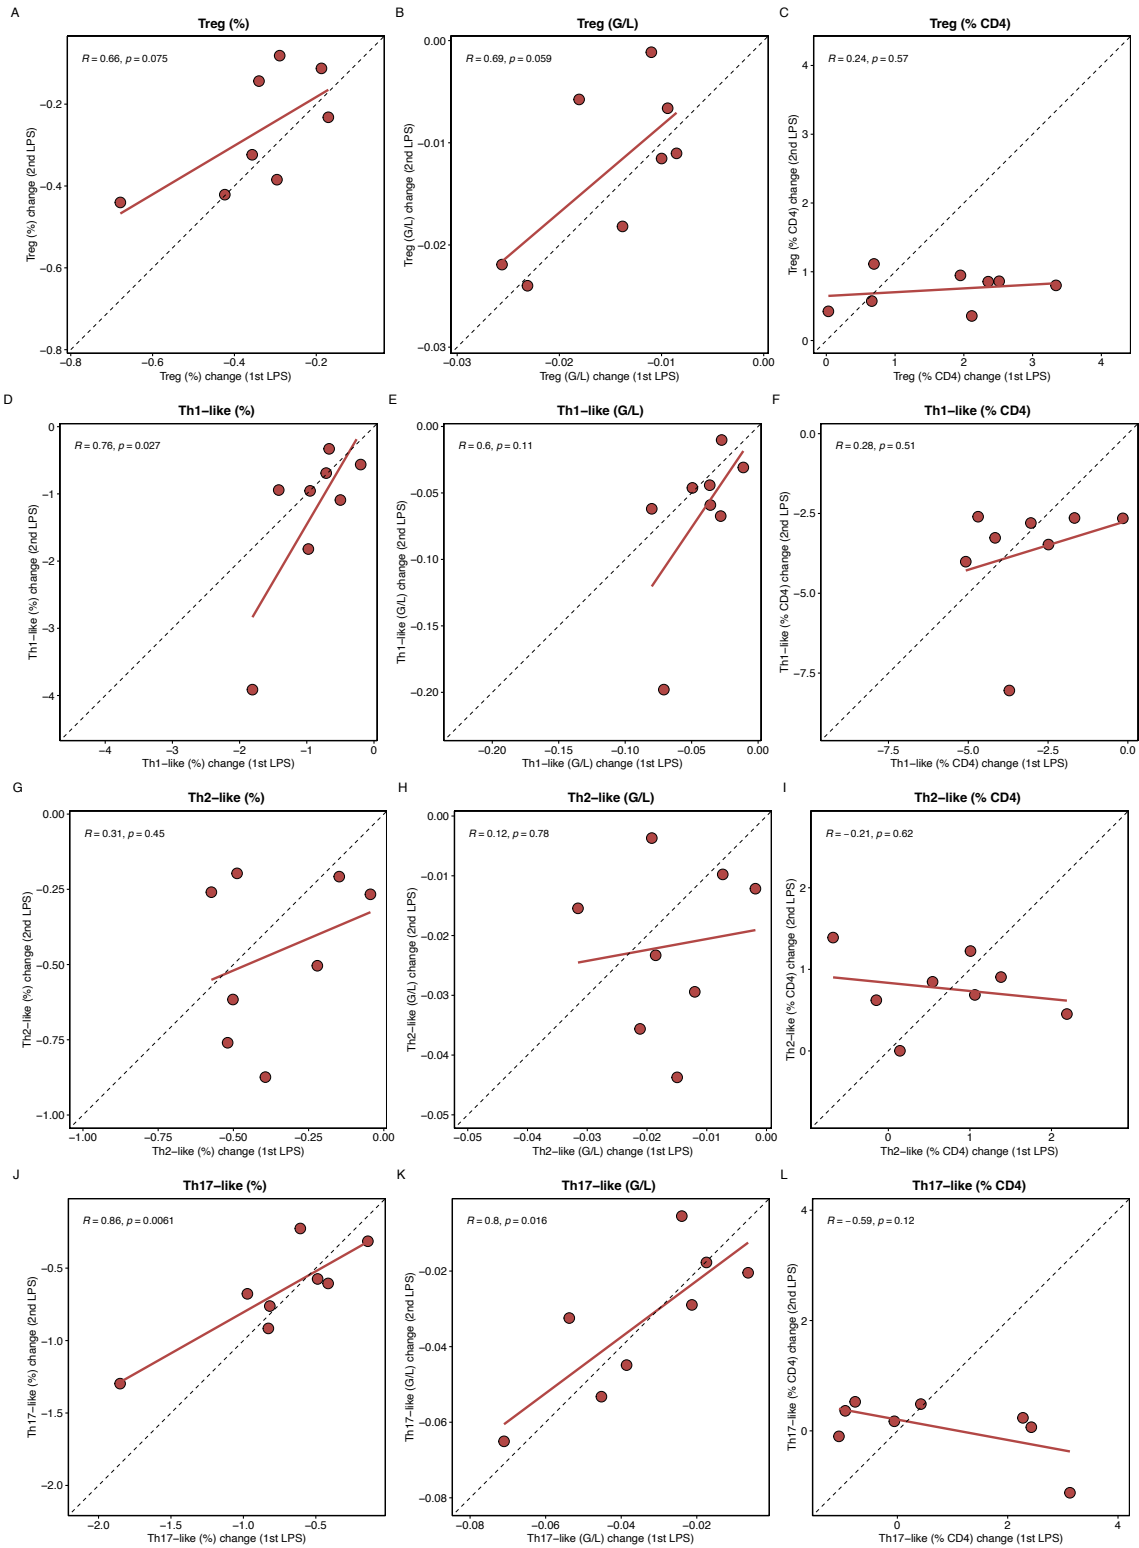

**Supplementary Figure 20** Correlation of difference ( $\Delta$  baseline to 4h) in helper and regulatory T lymphocyte subpopulations between 1<sup>st</sup> and 2<sup>nd</sup> endotoxin challenge

**Correlation of difference (preLPS to 4h postLPS) in Natural Killer and Gamma-Delta T cell populations between 1st and 2nd endotoxin challenge**

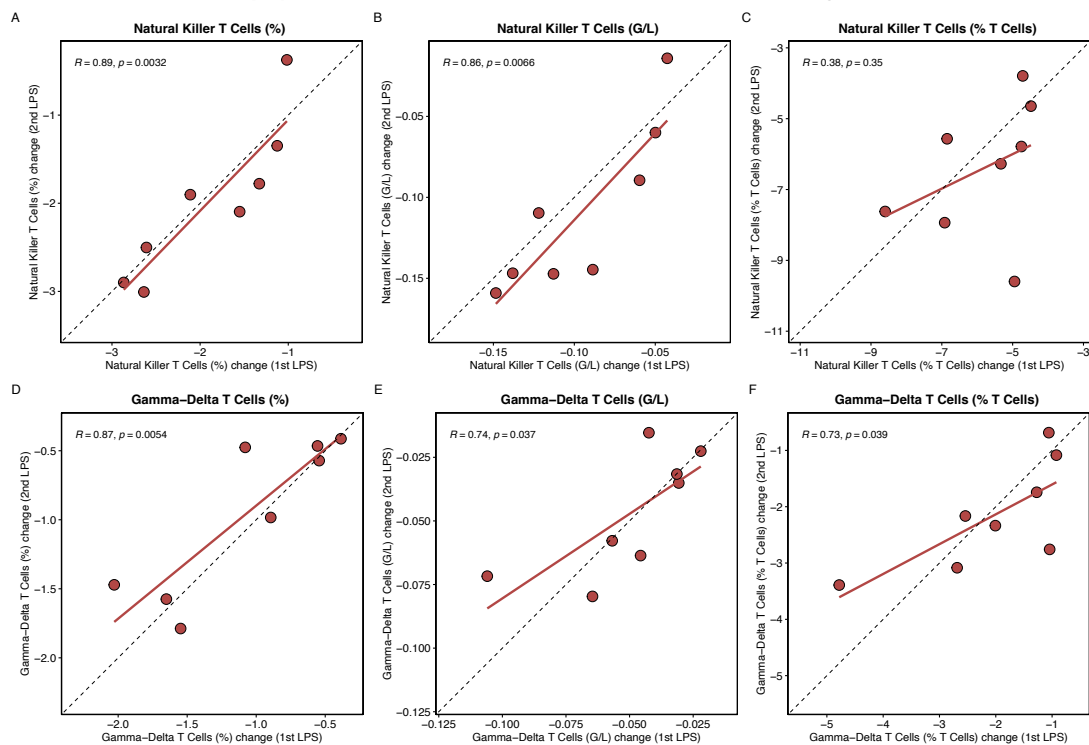

**Supplementary Figure 21** Correlation of difference ( $\Delta$  baseline to 4h) in Natural Killer T lymphocyte and Gamma-Delta T lymphocyte subpopulations between 1<sup>st</sup> and 2<sup>nd</sup> endotoxin challenge

**Correlation of difference (preLPS to 4h postLPS) in monocyte populations between 1st and 2nd endotoxin challenge**

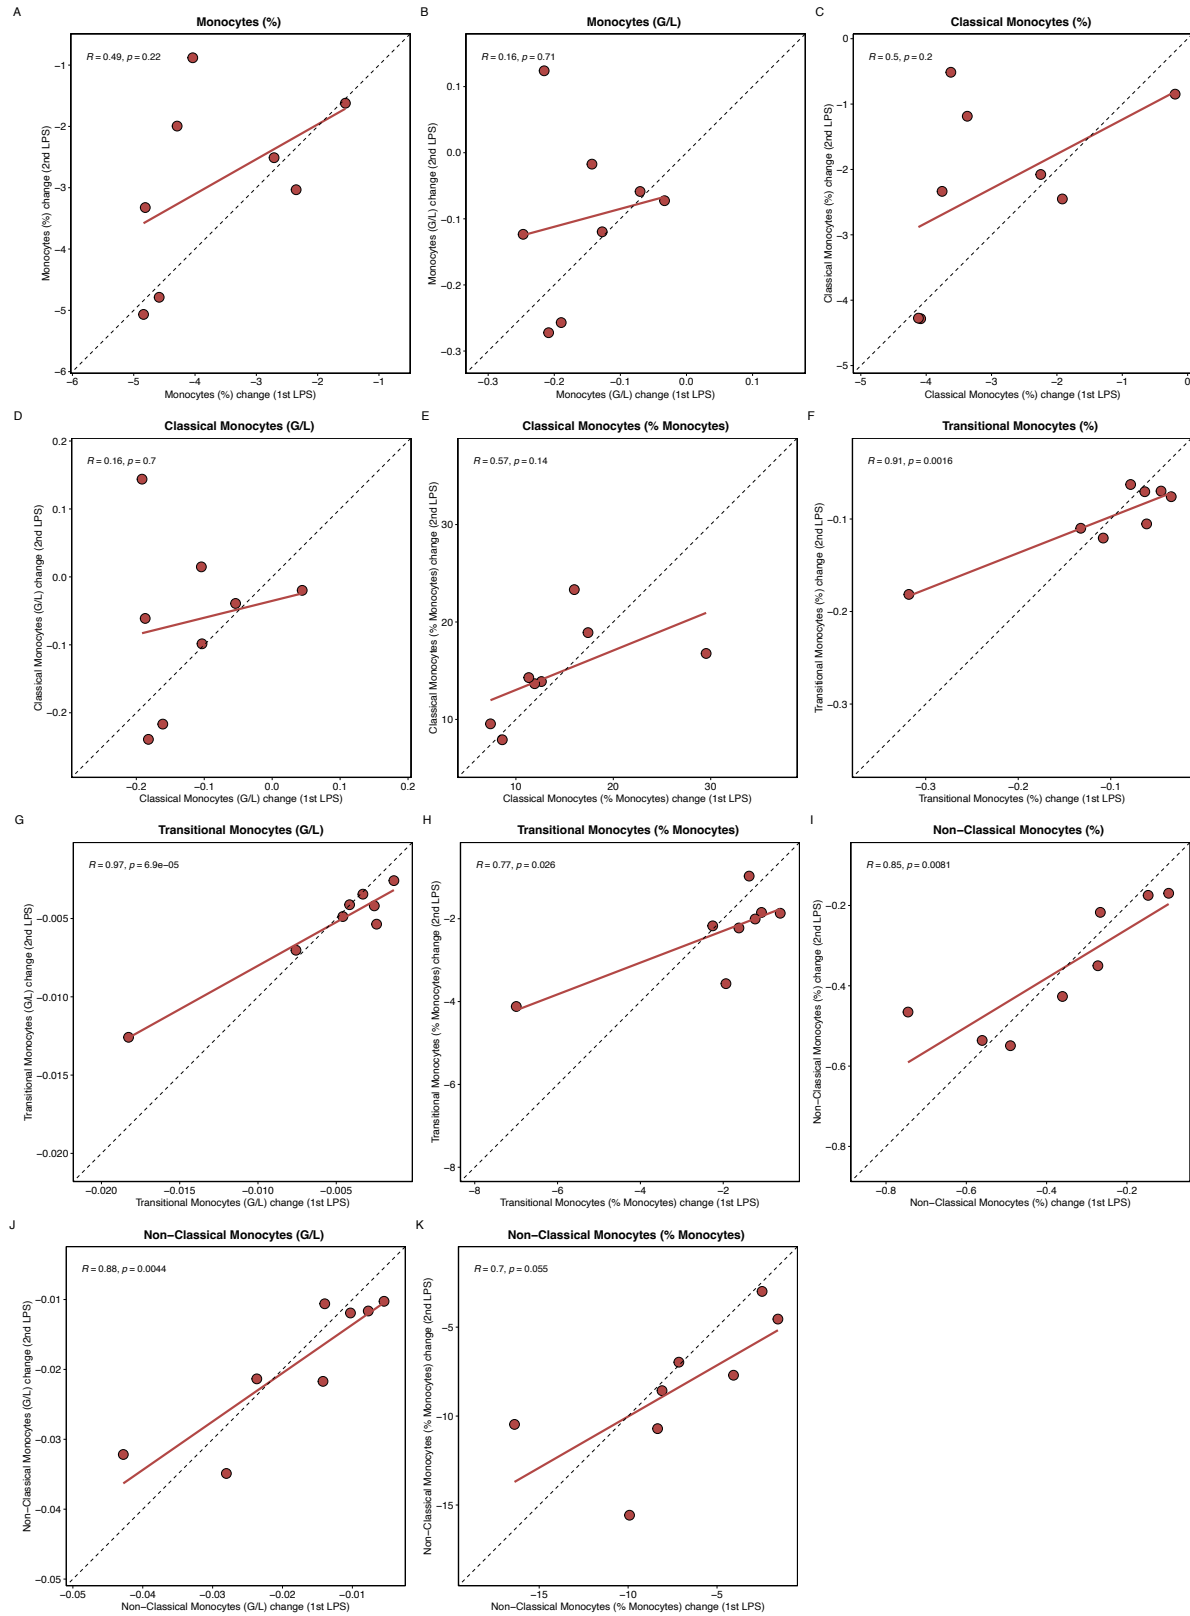

**Supplementary Figure 22** Correlation of difference ( $\Delta$  baseline to 4h) in monocyte subpopulations between 1<sup>st</sup> and 2<sup>nd</sup> endotoxin challenge

### Correlation of difference (preLPS to 4h postLPS) in Dendritic Cell populations between 1st and 2nd endotoxin challenge

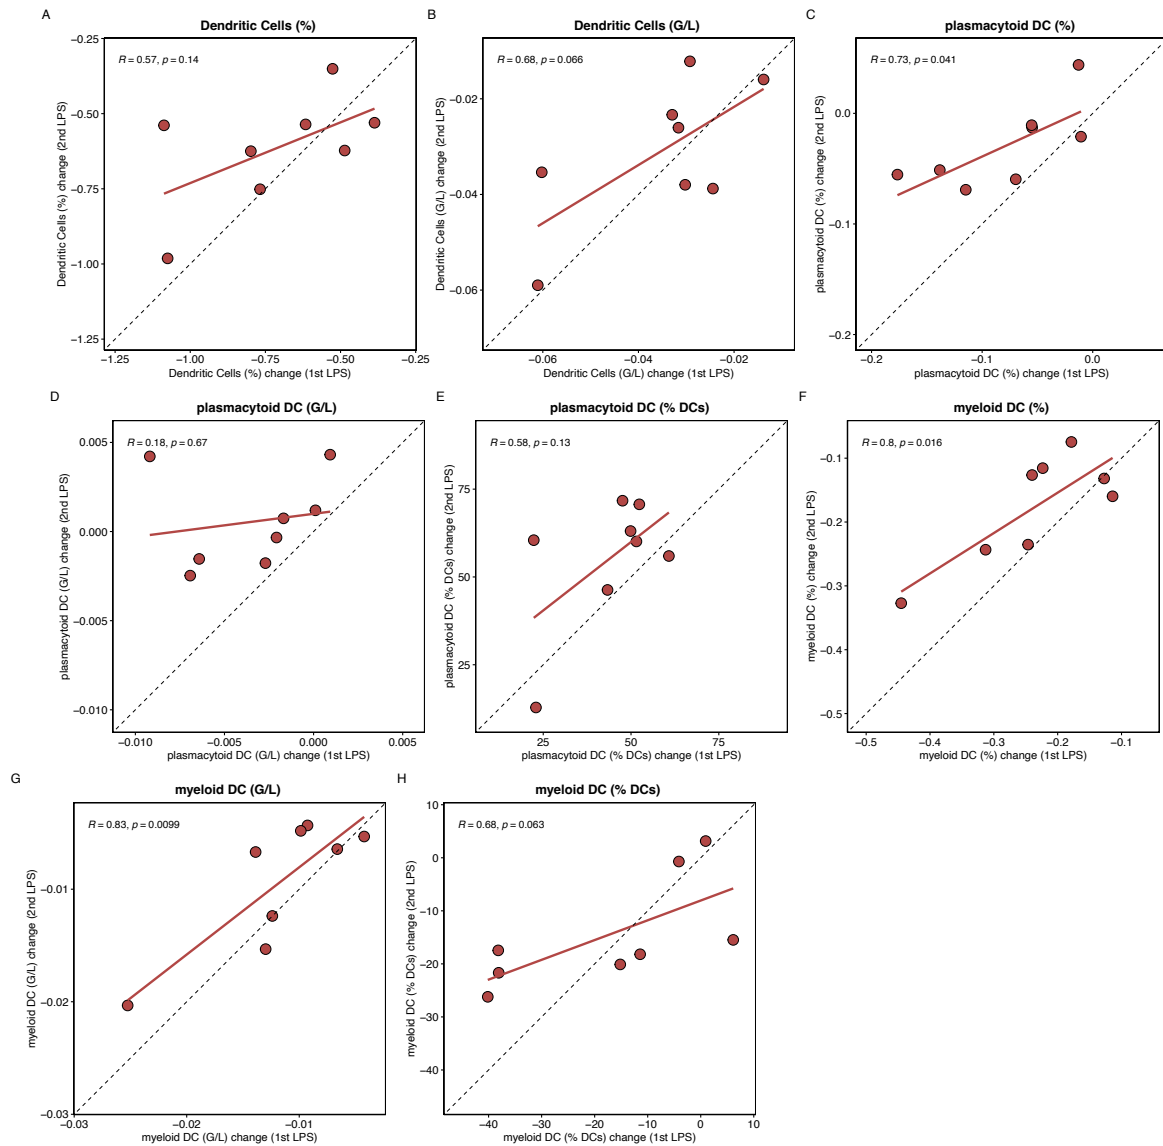

**Supplementary Figure 23** Correlation of difference ( $\Delta$  baseline to 4h) in dendritic cell subpopulations between 1<sup>st</sup> and 2<sup>nd</sup> endotoxin challenge



**Correlation of difference (preLPS to 4h postLPS) in Natural Killer cell populations between 1st and 2nd endotoxin challenge**

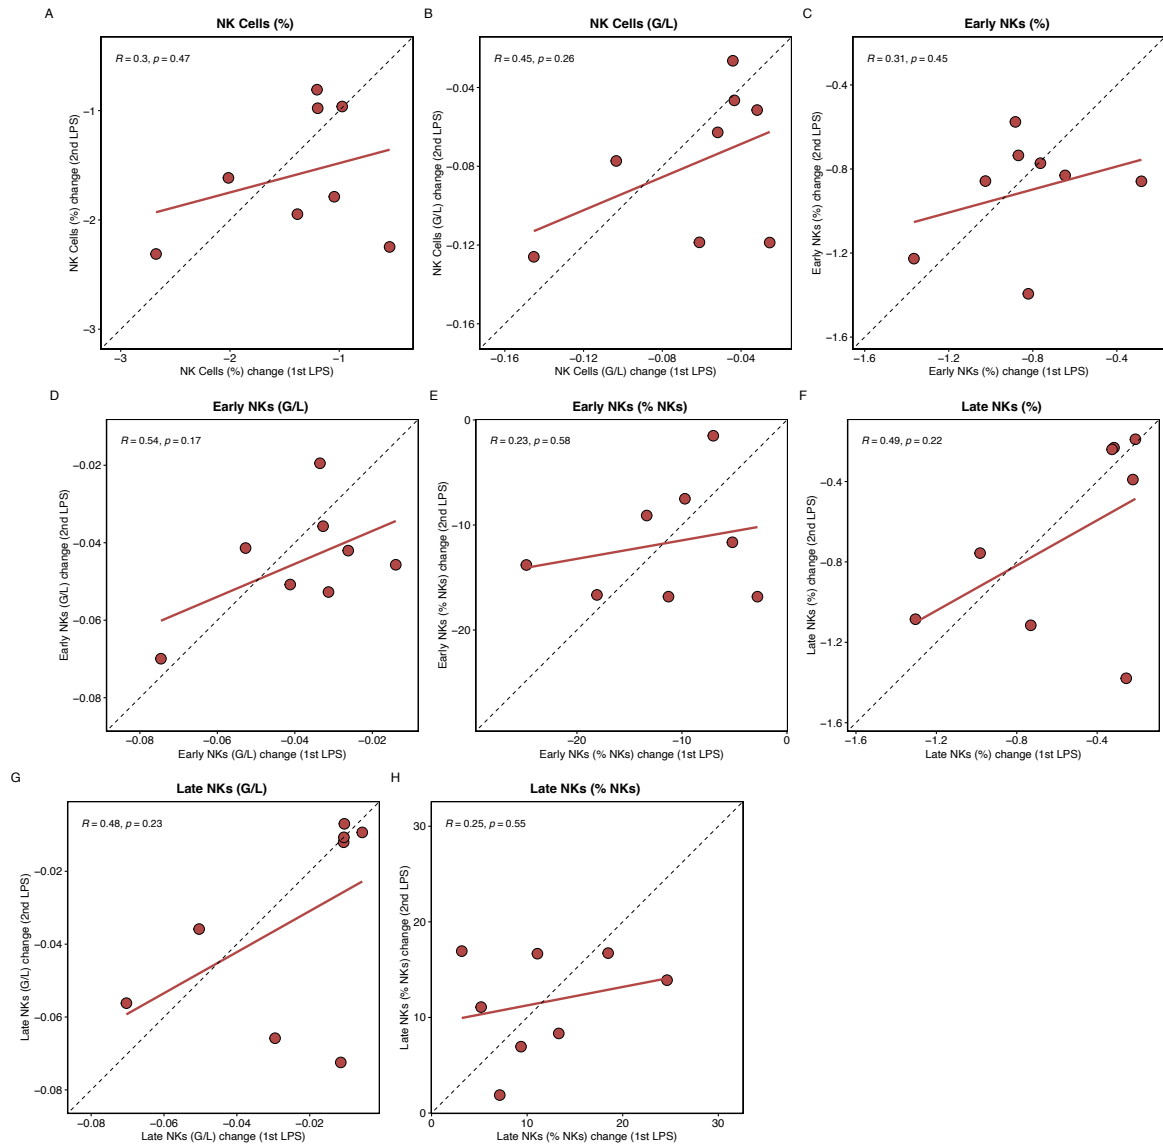

**Supplementary Figure 24** Correlation of difference ( $\Delta$  baseline to 4h) in natural killer cell subpopulations between 1<sup>st</sup> and 2<sup>nd</sup> endotoxin challenge

### Correlation of difference (preLPS to 4h postLPS) in Granulocyte populations between 1st and 2nd endotoxin challenge

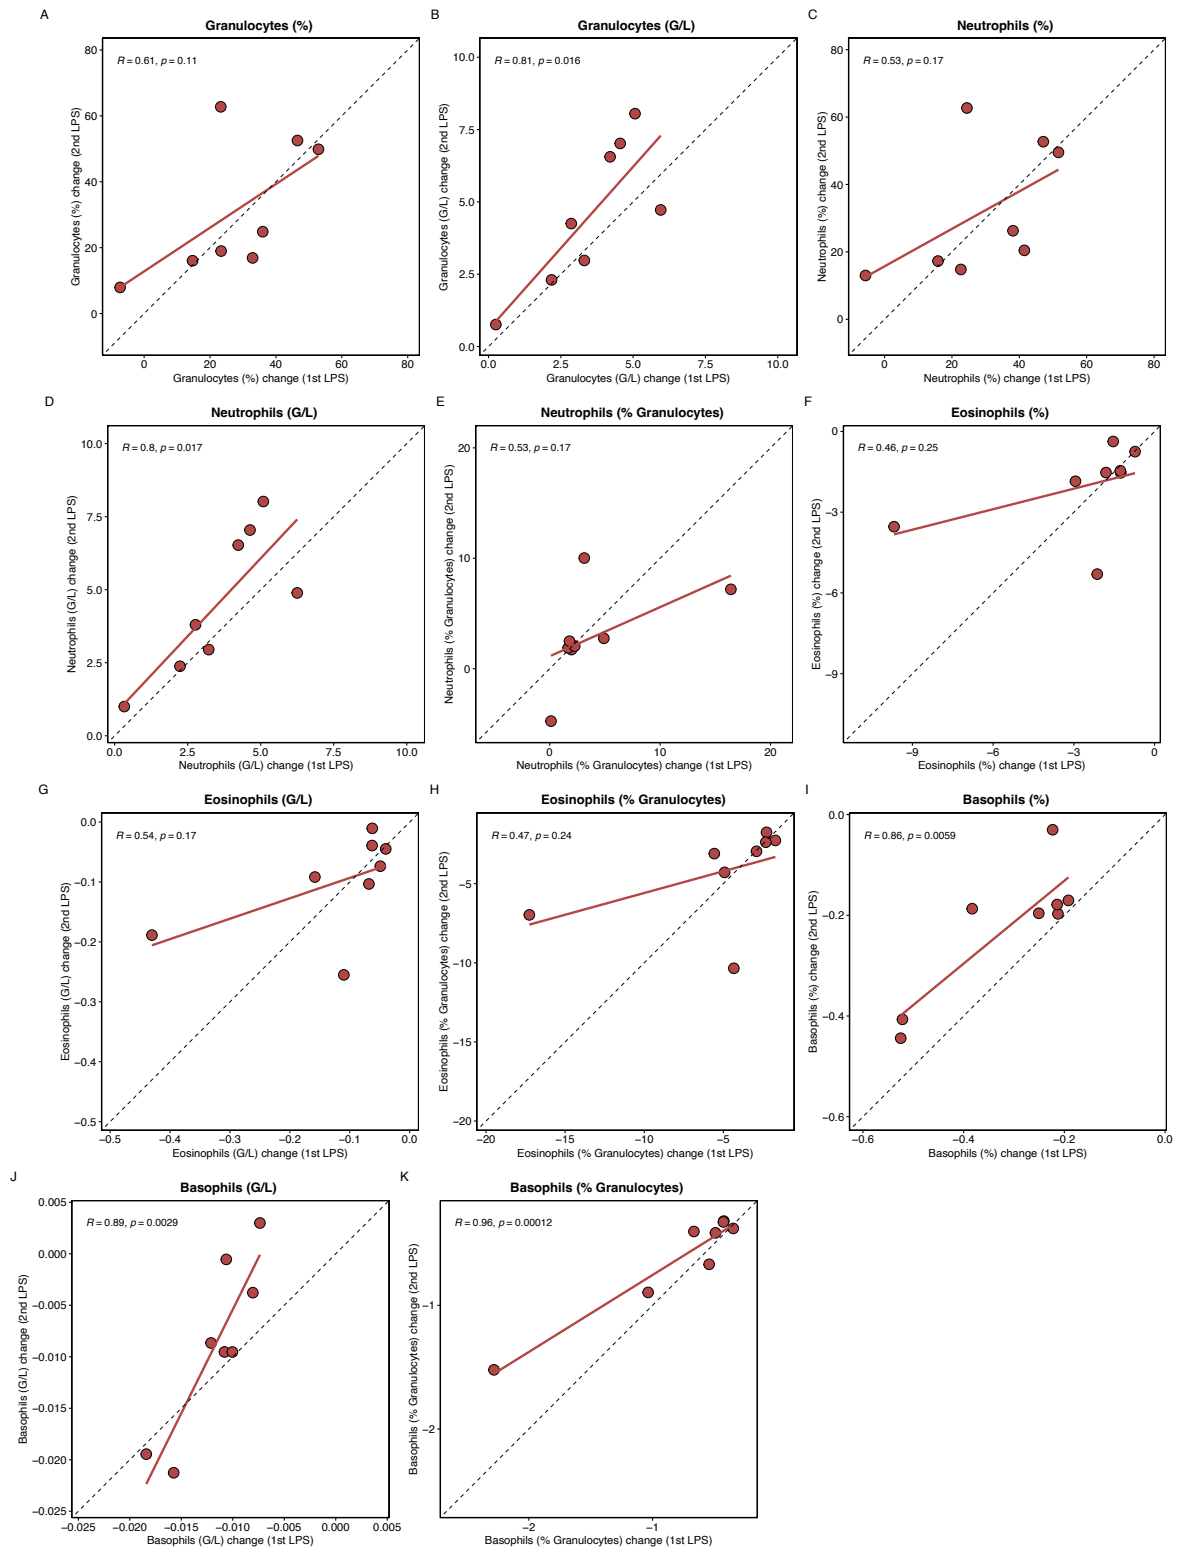

**Supplementary Figure 25** Correlation of difference ( $\Delta$  baseline to 4h) in granulocyte subpopulations between 1<sup>st</sup> and 2<sup>nd</sup> endotoxin challenge
